- 1 **Title:** Distinct forms of synaptic plasticity during ascending vs. descending control of medial
- 2 olivocochlear efferent neurons
- 3 **Authors:** Gabriel E. Romero<sup>1</sup> and Laurence O. Trussell<sup>2</sup>
- 4 **Affiliations:** <sup>1</sup>Physiology and Pharmacology Graduate Program, <sup>2</sup>Oregon Hearing Research
- 5 Center and Vollum Institute, Oregon Health and Science University
- 6 **\*Corresponding Author and Lead Contact:** [trussell@ohsu.edu](mailto:trussell@ohsu.edu)

7 **Abstract:**

8 Activity in each brain region is shaped by the convergence of ascending and descending axonal  
9 pathways, and the balance and characteristics of these determine neural output. The medial  
10 olivocochlear (MOC) efferent system is part of a reflex arc that critically controls auditory  
11 sensitivity. Multiple central pathways contact MOC neurons, raising the question of how a reflex  
12 arc could be engaged by diverse inputs. We examined functional properties of synapses onto  
13 brainstem MOC neurons from ascending (ventral cochlear nucleus, VCN), and descending  
14 (inferior colliculus, IC) sources in mice using an optogenetic approach. We found that these  
15 pathways exhibited opposing forms of short-term plasticity, with VCN input showing depression  
16 and IC input showing marked facilitation. By using a conductance clamp approach, we found  
17 that combinations of facilitating and depressing inputs enabled firing of MOC neurons over a  
18 surprisingly wide dynamic range, suggesting an essential role for descending signaling to a  
19 brainstem nucleus.

20 **Introduction:**

21 The cochlea is the peripheral organ of hearing. As such, it communicates with the central  
22 nervous system by its centrally-projecting afferent fibers. However, the cochlea also receives  
23 input from a population of cochlear efferent fibers that originate in the brainstem. The medial  
24 olivocochlear (MOC) system provides many of these efferent fibers, and may serve to protect the  
25 cochlea from acoustic trauma (Rajan, 1988; Kujawa and Liberman, 1997; Darrow et al., 2007)  
26 and to dynamically enhance the detection of salient sound in diverse sensory environments  
27 (Winslow and Sachs, 1987a; Kawase and Liberman, 1993) by controlling cochlear gain in a  
28 frequency and intensity specific manner. MOC efferent fibers arise from cholinergic neurons  
29 whose somata primarily reside in the ventral nucleus of the trapezoid body (VNTB) of the  
30 superior olivary complex (SOC) (Warr, 1975), and project to outer hair cells in the cochlea  
31 (Guinan et al., 1983, 1984; Wilson et al., 1991), and this peripheral control by efferents has been  
32 extensively studied (Guinan, 2010, 2018). MOC fibers respond to sound and form a negative  
33 feedback system, and is thus described as a reflex providing frequency-specific feedback to the  
34 cochlea (Liberman and Brown, 1986; Winslow and Sachs, 1987b; Brown, 2016). This feedback  
35 is mediated by acetylcholine released from terminals of MOC fibers, thereby inhibiting outer hair  
36 cell motility and decreasing cochlear sensitivity (Wiederhold and Kiang, 1970).

37

38 In contrast to this detailed understanding of peripheral efferent mechanisms, the  
39 electrophysiological properties of the efferent neurons and their control by central pathways  
40 remain unclear, and indeed it is not known even to what extent these neurons function as a reflex  
41 arc or as mediators of descending control by higher brain regions. For example, excitatory  
42 synaptic inputs that modulate and control MOC neuron function are made both by ascending

43 input from the cochlear nucleus (termed here the ‘reflex pathway’), and by descending input  
44 from areas that include brainstem, inferior colliculus (IC), and auditory cortex (Thompson and  
45 Thompson, 1993; Vetter et al., 1993; Mulders and Robertson, 2002). The reflex MOC pathway  
46 receives ascending auditory input from principal neurons in the ventral cochlear nucleus (VCN),  
47 possibly by T-stellate cells (Thompson and Thompson, 1991; De Venecia et al., 2005; Darrow et  
48 al., 2012; Brown et al., 2013). While T-stellate cells are anatomically and physiologically well  
49 suited to provide auditory information to MOC neurons (Oertel et al., 2011), and receive input  
50 from type I spiral ganglion neurons, whose axons form the auditory nerve, in fact no direct  
51 evidence shows that these neurons activate MOC neurons. Descending projections from the IC  
52 contact MOC neurons (Faye-Lund, 1986; Thompson and Thompson, 1993; Vetter et al., 1993),  
53 and are tonotopically arranged, as low-frequency fibers project laterally, and high frequencies  
54 increasingly project more medially (Caicedo and Herbert, 1993; Suthakar and Ryugo, 2017).  
55 Descending input may utilize the MOC system to suppress cochlear input during non-auditory  
56 tasks (Delano et al., 2007; Wittekindt et al., 2014), and is well positioned to aid sound detection  
57 in noise by contextually inhibiting background frequency spectra (Farhadi et al., 2021).  
58 However, again direct evidence for the significance of such descending control is lacking, and in  
59 particular whether such inputs can drive the efferent system, or merely modify the control  
60 mediated by the reflex pathway.

61

62 We have investigated the physiological properties of MOC neurons, testing the relative efficacy  
63 of synaptic inputs made by reflex vs descending pathways. MOC efferent neurons were labeled  
64 for targeted patch-clamp recording in brain slices from 30- to 48-day-old ChAT-IRES-Cre mice,  
65 and properties of ascending and descending synaptic inputs onto these neurons from VCN and IC



66 were analyzed using virally-driven optogenetic excitation. By making recordings from identified  
67 neurons in mature mice we found that MOC neurons are exceptionally homogeneous in their  
68 electrophysiological properties, and are well suited to encoding stimulus intensity and duration  
69 with sustained firing at constant rates. Synaptic inputs to MOC neurons from the VCN and IC  
70 are glutamatergic, and both transmit using fast-gating  $\text{Ca}^{2+}$ -permeable  $\alpha$ -amino-3-hydroxy-5-  
71 methyl-4-isoxazolepropionic acid (AMPA) receptors. Using a novel intersectional adeno-  
72 associated virus (AAV) approach that enabled optical excitation of only T-stellate cells in the  
73 VCN, we were able to provide direct evidence that T-stellate cells are an excitatory interneuron  
74 involved in MOC reflex circuitry. However, comparing the short-term synaptic plasticity of  
75 VCN and IC inputs, we discovered that at the same stimulus rates, VCN input exhibited rapid  
76 short-term depression, while IC input exhibited augmentation, increasing several-fold in synaptic  
77 strength. Conductance-clamp experiments, in which these inputs were simulated with realistic  
78 patterns of activity, showed that descending control of hair cell activity may be a potent means  
79 for engaging the full dynamic range of activity of MOC neurons, thus permitting broad control of  
80 cochlear sensitivity.

81

## 82 **Results:**

83 *Cholinergic auditory efferent neurons are tdTomato-positive in ChAT-Cre/tdTomato mice*

84 The SOC features two groups of cholinergic olivocochlear efferent neurons, lateral olivocochlear  
85 (LOC) neurons and MOC neurons (Warr and Guinan, 1979). The somata of MOC neurons reside  
86 primarily in the VNTB, whereas LOC neurons are smaller, more numerous, and located in the  
87 lateral superior olive (LSO). While MOC neurons exert inhibitory control over outer hair cells in  
88 the cochlea, LOC neurons modulate the excitability of the auditory nerve, as they mainly

89 terminate onto dendrites of Type I spiral ganglion neurons near sensory inner hair cells  
90 (Liberman, 1980).

91

92 In order to visualize cholinergic efferent neurons in the SOC of acute brain slices for whole-cell  
93 recording, we crossed a ChAT-IRES-Cre mouse line with a reporter line, Ai9(RCL-tdT), that  
94 expressed the fluorophore tdTomato in a Cre recombinase-dependent manner (Torres Cadenas et  
95 al., 2019). This cross will be referred to as ChAT-Cre/tdTomato. Neurons positive for tdTomato  
96 were visible in the LSO and VNTB of the SOC, and co-labeled with anti-ChAT antibody,  
97 confirming they were cholinergic neurons (Figure 1A-C). A majority of tdTomato positive  
98 neurons in the ipsilateral LSO and contralateral VNTB were retrogradely labeled by injecting  
99 cholera toxin subunit B (CTB) into the cochlea, confirming that they were indeed auditory  
100 efferent neurons (Figure 1D-E). While MOC neurons project primarily to contralateral cochlea,  
101 and LOC neurons project primarily to ipsilateral cochlea, each group contains fibers projecting to  
102 both cochleae (Warr, 1975; Warr and Guinan, 1979; Brown and Levine, 2008). Contralateral to  
103 unilateral cochlear CTB injections, 66.1 % of tdTomato positive VNTB neurons were labeled,  
104 and in ipsilateral VNTB 28.9 % were labeled (Figure 1F).

105

106 *Medial olivocochlear neurons accurately encode stimulus intensity and duration*

107 *In vivo* recordings have revealed that MOC neurons exhibit little or no spontaneous activity, and  
108 respond to sound in a frequency- and intensity-dependent manner (Robertson and Gummer,  
109 1985; Liberman and Brown, 1986). To investigate how intrinsic membrane properties of MOC  
110 neurons underlie *in vivo* responses, whole-cell patch-clamp recordings were made from  
111 tdTomato positive MOC neurons in the VNTB from acute brain slices of ChAT-Cre/tdTomato

112 mice. We found that the majority of MOC neurons had a resting membrane potential of  $-80.4 \pm$   
113  $0.8$  mV ( $N = 56$ ), and were silent at rest (only 3/59 neurons were spontaneously active),  
114 consistent with the low frequency of spontaneous activity observed *in vivo* (Fex, 1962; Cody and  
115 Johnstone, 1982; Robertson, 1984; Robertson and Gummer, 1985). The membrane capacitance  
116 ( $C_m$ ) and resistance ( $R_m$ ) were  $36.5 \pm 1.6$  pF and  $123 \pm 9$  M $\Omega$  ( $N = 59$ ), respectively. In response  
117 to hyperpolarizing current injections, MOC neurons lacked an apparent voltage ‘sag’, indicating  
118 minimal expression of hyperpolarization-activated cyclic nucleotide-gated (HCN) channels  
119 (Figure 2A). Depolarizing currents near action potential threshold revealed a biphasic after-  
120 hyperpolarization waveform following each spike (Figure 2A, see arrowhead in +0.5 nA  
121 example, observed in 57/59 MOC neurons). In response to increasing amplitude of 500-ms  
122 depolarizing current injections, MOC neurons fired action potentials that encoded stimulus  
123 current intensity with a remarkably linear increase in spike rate (Figure 2A-D). For injections up  
124 to 900 pA, MOC neurons ( $N = 33$ ) responded with linearly increasing spike rates, such that the  
125 rate nearly doubled when current injections were doubled in intensity, as reflected by the slope of  
126 a linear fit to the mean data (slope = 0.150 Hz/pA) (Figure 2C). Many MOC neurons continued  
127 to respond linearly to current injections up to 2-4 nA (Figure 2A & D) before entering  
128 depolarization block. Throughout the duration of these 500-ms depolarizing current injections,  
129 action potentials fired with a generally consistent instantaneous rate (Figure 2B & E). The ratio  
130 of instantaneous spike-rate during the last five action potentials (i.e., the steady-state frequency)  
131 compared to spikes #5-10 (initial frequency) decreased somewhat with increasing current  
132 intensity (Figure 2E & F);  $0.86 \pm 0.01$  at 200 pA, and  $0.69 \pm 0.02$  at 900 pA ( $N = 11$ ). However,  
133 individual cells linearly encoded current intensity with both their initial and their steady-state  
134 instantaneous spike-frequencies (initial slope = 0.255 Hz/pA; steady-state slope = 0.158 Hz/pA)

135 (Figure 2F). These results using current steps suggest that MOC neurons are well suited to  
136 delivering steady efferent signals to the cochlea in exact proportion to the intensity of their  
137 ongoing synaptic input. Therefore, we next explored the properties of synaptic inputs to MOC  
138 neurons to determine how this intrinsic firing capacity is utilized under more physiological  
139 conditions.

140

141 *Light-evoked EPSCs produced by ascending ventral cochlear nucleus input are due to fast-*  
142 *gating, inwardly-rectifying AMPARs*

143 To activate excitatory ascending VCN input onto MOC neurons, the VCN was unilaterally  
144 infected with 50 nL of AAV expressing channelrhodopsin (ChR2) fused to the fluorophore  
145 Venus (AAV1-CAG-ChR2-Venus-WPRE-SV40) (Figure 3—Supplemental Figure 1A). These  
146 injections resulted in Venus expression in VCN (Figure 3A) and Venus-positive fiber projections  
147 to the contralateral VNTB and rostral periolivary regions (RPO) (Figure 3B); moreover, Venus  
148 positive boutons were observed in close proximity to MOC neuron dendrites and somata in the  
149 VNTB (Figure 3C). Loose patch recordings were conducted in acute brain slices on Venus  
150 positive VCN neurons to determine if potentials mediated by light-activation of virally  
151 transduced ChR2 would reach action potential threshold at the level of the soma. Venus positive  
152 VCN neurons reliably fired action potentials in response to repetitive 2-ms flashes of blue light  
153 (see example, Figure 3D). The postsynaptic effects of activation of ChR2 were then examined in  
154 whole-cell recordings from MOC neurons made in the presence of 5  $\mu$ M strychnine and 10  $\mu$ M  
155 SR95531 to block inhibitory receptors, and 10  $\mu$ M MK-801 to block NMDA receptors. Light-  
156 evoked EPSCs were observed in MOC neurons both ipsi- and contralateral to the injection site,  
157 and the data were combined. EPSCs were abolished with a selective non-competitive AMPA

158 receptor antagonist, GYKI 53655 (50  $\mu$ M,  $N = 3$ , not shown) indicating that they were  
159 glutamatergic and used AMPA receptors. For individual neurons held at -62.8 mV, twenty light-  
160 evoked EPSCs were averaged and their decay phases were best fit with either a single ( $N = 7$ ) or  
161 double ( $N = 5$ ) exponential equation. The decay time constant ( $\tau$ ) of double exponential fits were  
162 reported as a fast decay component ( $\tau_{fast}$ ), and slow decay component ( $\tau_{slow}$ ), see Table 1. For  
163 comparison between double and single exponential fits,  $\tau_{fast}$  and  $\tau_{slow}$  were converted to a  
164 weighted decay time constant,

$$165 \tau_w = \tau_{fast} * \%A_{fast} + \tau_{slow} * (1 - \%A_{fast}), \text{ where } \%A_{fast} = \frac{A_{fast}}{A_{slow} + A_{fast}}.$$

166  $A_{fast}$  and  $A_{slow}$  are the absolute amplitudes of each component. There was no significant  
167 difference between  $\tau$  from single exponential fits and  $\tau_w$ . Current voltage relations were  
168 constructed by plotting the peak amplitude of EPSCs evoked at holding potentials between -82.8  
169 and +57.2 mV (20-mV steps), and exhibited prominent inward rectification (Figure 3E-F). The  
170 voltage sensitivity of the peak currents, together with the fast decay of the EPSCs are strongly  
171 suggestive of postsynaptic GluA2-lacking,  $Ca^{2+}$ -permeable AMPARs (CP-AMPARs)  
172 (Mosbacher et al., 1994; Bowie and Mayer, 1995; Donevan and Rogawski, 1995; Geiger et al.,  
173 1995).

174

### 175 *Selective activation of T-stellate neurons using an intersectional AAV approach*

176 The results described above indicate that input from VCN-originating axons generate EPSCs in  
177 MOC neurons, but do not indicate which subtype of VCN neuron is involved. Given the  
178 presence of multiple subtypes of VCN excitatory neurons, and the absence of selective Cre lines  
179 for these subtypes, a definitive demonstration of the source of input to MOC neurons is  
180 challenging. T-stellate (also called planar multipolar) cells of the VCN are excitatory projection

181 neurons that receive auditory nerve input (Oertel et al., 2011). As a population, they may encode  
182 sound intensity and frequency spectrum. T-stellate cells are a major ascending pathway of the  
183 auditory system which project widely to many targets, and are the only VCN cell which projects  
184 to the IC.

185

186 Several reports suggest that T-stellate cells serve as an interneuron in the MOC reflex pathway  
187 (Thompson and Thompson, 1991; De Venecia et al., 2005; Darrow et al., 2012), although there  
188 is currently no direct evidence for functional connectivity between T-stellate cells and MOC  
189 neurons. We developed a scheme to selectively activate T-stellate cells using an intersectional  
190 AAV approach in order to perform virally driven optogenetic studies of ascending MOC  
191 circuitry (Figure 4Ai-ii). An AAV engineered to infect axons in addition to neurons local to the  
192 injection site (AAVrg-pmSyn1-EBFP-Cre) (Tervo et al., 2016) was injected into IC of ChAT-  
193 Cre/tdTomato mice, causing Cre-dependent tdTomato expression in cells that project to and from  
194 IC, including T-stellate cells in the VCN (Figure 4Ai & Bii). Prior to AAV infection, no somata  
195 were positive for tdTomato in VCN or IC of ChAT-Cre/tdTomato mice (Figure 4Bi, Figure 4—  
196 Supplemental Figure 1A). One-to-two weeks post IC infection with AAVrg-pmSyn1-EBFP-Cre,  
197 tdTomato positive somata were located near the injection site and nuclei that send projections to  
198 IC, including contralateral IC (Figure 4—Supplemental Figure 1B). A majority of retrogradely  
199 labeled VCN somata were located contralateral to the injection site (Figure 4Bii), whereas few  
200 were seen in ipsilateral VCN (Figure 4—Supplemental Figure 1C), reflecting previously  
201 described ipsilateral T-stellate cell projections (Adams, 1979; Thompson, 1998).

202

203 In recordings from tdTomato positive VCN neurons ( $N = 13$ ) in AAVrg-pmSyn1-EBFP-Cre  
204 infected ChAT-Cre/tdTomato mice, all neurons exhibited responses to current injections that  
205 were characteristic of T-stellate cells (see example in Figure 4C). Action potentials fired  
206 tonically with a sustained rate in response to depolarizing current injections (Figure 4D).  
207 Hyperpolarizing current injections revealed a rectifying voltage response characteristic of HCN  
208 nonselective cation channels (Figure 4C). Additionally, membrane resistance ( $R_m = 147.6 \pm 21.5$   
209  $M\Omega$ ) and membrane capacitance ( $C_m = 32.9 \pm 2.6$  pF) were typical of T-stellate cells (Wu and  
210 Oertel, 1987; Ferragamo et al., 1998; Golding et al., 1999).

211  
212 A second virus that expressed Cre-dependent ChR2 and enhanced yellow fluorescent protein  
213 (EYFP) was then injected into the VCN, enabling ChR2 and EYFP expression only in T-stellate  
214 cells that project to contralateral IC (Figure 4Aii, Ei-F). VCN neurons positive for EYFP were  
215 also positive for tdTomato (Figure 4Ei-F), confirming the selectivity of this intersectional AAV  
216 approach. Dual infected VCN neurons projected to known T-stellate cell target nuclei, including  
217 contralateral IC, contralateral and ipsilateral VNTB, ipsilateral LSO, and contralateral lateral  
218 lemniscus (Figure 4—Supplemental Figure 1D-I). During whole-cell voltage-clamp recording,  
219 optogenetic activation of T-stellate input evoked EPSCs in contralateral MOC neurons ( $N = 4$ ,  
220 Figure 4G) confirming that T-stellate neurons excite post-synaptic MOC efferent neurons. Decay  
221 kinetics of T-stellate input to MOC neurons were not significantly different compared to non-  
222 specific VCN-input (Table 1), suggesting similar post-synaptic AMPA receptor composition.  
223 These results definitively show that at least a subset of IC projecting T-stellate cells provide  
224 glutamatergic excitatory input to MOC neurons.

225

226 *Light evoked EPSCs produced by descending inferior colliculus input are due to fast-gating,*  
227 *inwardly rectifying AMPARs*

228 To activate excitatory descending IC input onto MOC neurons, the IC of ChAT-Cre/tdTomato  
229 mice were unilaterally infected with 100 nL of AAV1-CAG-ChR2-Venus-WPRE-SV40  
230 (Petreanu et al., 2009) (Figure 3—Supplemental Figure 1B), an anterograde-transported viral  
231 construct. One-to-two weeks post-infection, Venus was observed in somata throughout the  
232 injected IC (Figure 5A). The majority of Venus positive fibers were visible in the ventral portion  
233 of the VNTB and RPO in close apposition to MOC neuron somata and dendrites (Figure 5B,  
234 Figure 5—Supplemental Figure 1). Loose patch, cell-attached recordings of Venus positive  
235 neurons in the IC were conducted to assess ChR2 expression. IC neurons positive for Venus fired  
236 action potentials in response to 2-ms flashes of blue light (see example in Figure 5C), confirming  
237 that ChR2 currents could reliably elicit action potentials in response to high-frequency light  
238 stimuli. Similar to VCN input onto MOC neurons, evoked EPSCs originating from IC input were  
239 mediated by inwardly-rectifying AMPARs (Figure 5D-E). This suggests that IC and VCN  
240 synapses onto MOC neurons both transmit by means of postsynaptic CP-AMPARs.

241

242 *Inward rectification is due to endogenous polyamine block and Ca<sup>2+</sup>-permeable AMPARs*

243 GluR2-lacking, or CP-AMPARs, show rapid decay kinetics, and inward rectification due to  
244 voltage-dependent block by intracellular polyamines (Bowie and Mayer, 1995; Donevan and  
245 Rogawski, 1995). Demonstration of such block by polyamines could support the interpretation  
246 that inputs to MOC neurons are indeed GluR2-lacking. We reasoned that removal of  
247 endogenous polyamines by dialysis would be most effective near the patch pipette, and  
248 comparatively weak in dendrites where excitatory synapses are likely concentrated. Therefore,



249 we applied glutamate by pressure ejection directly to the soma, and tested voltage dependence in  
250 recordings in which the patch pipette solution contained or lacked the polyamine spermine (100  
251  $\mu\text{M}$ ). In the presence of intracellular spermine, glutamate-evoked currents resulted in an  
252 inwardly rectifying current-voltage (I-V) relation (Figure 6A-B), similar to light-evoked EPSCs  
253 from IC or VCN input (Figures 3E-F & 5D-E). When recordings were made with a spermine-  
254 free solution, the I-V relation was linear (Figure 6A-B). At +37.2 mV and +57.2 mV, 57.9 % and  
255 58.9 % of the outward current was blocked by spermine, respectively, suggesting a majority of  
256 AMPAR-mediated currents are due to CP-AMPARs.

257  
258 CP-AMPARs are selectively blocked by IEM 1925 dihydrobromide, which binds to the ion-  
259 channel pore in GluA2-lacking receptors more potently than GluA2-containing receptors  
260 (Zaitsev et al., 2011; Twomey et al., 2018). CP-AMPAR block by IEM 1925 is both activity and  
261 voltage dependent, requiring open-state channels and negative potentials. Thus, the amount of  
262 block is weakest during spontaneous and evoked synaptic events, and is greatest during  
263 continuous application of agonist. To maximally inhibit CP-AMPAR mediated currents with  
264 IEM 1925, MOC neurons were held at a potential of -82.8 mV in voltage-clamp mode, and 1  
265 mM glutamate was pressure-puffed near MOC neuron somata. After bath application of 25  $\mu\text{M}$   
266 IEM 1925, glutamate-evoked currents were reduced by  $55.3 \pm 1.6$  %, and returned to  $81.2 \pm 3.0$   
267 % of control after wash ( $N = 3$ , Figure 6C). This percentage of block by IEM 1925 was similar to  
268 that of spermine block in our dialysis experiments (Figure 6B). The blocking effect of IEM 1925  
269 on glutamate-evoked currents pharmacologically confirmed that MOC neurons express GluA2-  
270 lacking CP-AMPARs.

271

272 *MOC neuron miniature EPSCs are mediated by fast-gating AMPARs*

273 To determine if rapid decay kinetics measured from IC and VCN originating EPSCs were  
274 synapse specific, or a fundamental feature of MOC neuron excitatory synaptic events, we  
275 conducted an analysis of miniature EPSCs (mEPSCs). AMPA receptor mediated currents were  
276 pharmacologically isolated and recorded in the presence of 1  $\mu$ M TTX to block spontaneous  
277 spike-driven events. The decay phase of average miniature events was best fit with a double  
278 exponential function, where  $\tau_{\text{fast}}$  was responsible for  $89.0 \pm 3.0$  % of the mEPSC amplitude (see  
279 Table 1, and example Figure 6D). The average  $\tau_{\text{fast}}$  and  $\tau_{\text{slow}}$  of mEPSCs were  $0.17 \pm 0.01$  ms  
280 and  $1.72 \pm 0.43$  ms, respectively ( $N = 3$  neurons, 1873 mEPSCs). The inter-event interval (IEI)  
281 between mEPSCs ranged from 6.8 ms to 2.6 seconds, and each event was counted and sorted  
282 into 20 ms bins (Figure 6E). The distribution of binned mEPSC inter-event intervals was best  
283 described with a single exponential equation ( $\tau = 0.20$  seconds), reflecting that the miniature  
284 events were stochastic in nature (Fatt and Katz, 1952). The average and median mEPSC  
285 amplitudes were  $57.5 \pm 0.9$  pA and 52.5 pA, respectively, and ranged from 27.2 pA to 146.9 pA  
286 (Figure 6F). In comparison with light-evoked EPSCs from IC and VCN (Table 1), these results  
287 confirmed that the majority of mEPSCs were due to fast-gating AMPARs. Together, supportive  
288 of data from light-evoked EPSCs and glutamate-puff evoked currents, these results suggest that  
289 fast-gating CP-AMPARs are the major component of excitatory synaptic transmission at MOC  
290 neurons.

291

292 *Ascending and descending inputs to medial olivocochlear neurons show distinct, opposite forms*  
293 *of short-term plasticity*

294 The AMPARs mediating transmission from VCN and IC were biophysically similar (Table 1).  
295 However, input-specific repetitive activation of VCN or IC inputs revealed strikingly opposing  
296 forms of short-term plasticity (Figure 7). During 20-pulse tetanus stimuli (20 or 50 Hz), light-  
297 evoked VCN-originating EPSCs depressed whereas IC-originating EPSCs facilitated (Figure 7A-  
298 D). Plasticity from either input was observed bilaterally in the VNTB and the data was  
299 combined. To quantify change in EPSC amplitude during VCN stimulation, the ratio of the  
300 amplitude of the last three EPSCs of the tetanus over the amplitude of the first EPSC was  
301 calculated. For IC stimulation, the amplitude of the last three EPSCs of the tetanus was  
302 compared to the average amplitude of the first three EPSCs. This ‘plasticity index’ showed about  
303 70% depression for VCN inputs, with no difference between 20 Hz or 50 Hz activity ( $0.31 \pm$   
304  $0.02$  for 20 Hz,  $N = 8$ ;  $0.29 \pm 0.04$  for 50 Hz,  $N = 7$ ,  $p = .59$ , Student’s *t*-test, Figure 7C). By  
305 contrast, inputs from IC showed marked enhancement of the plasticity index during the train,  
306 although again with no differences between 20 Hz and 50 Hz ( $1.82 \pm 0.17$  for 20 Hz,  $N = 8$ ;  $1.65$   
307  $\pm 0.26$  for 50 Hz  $N = 7$ ,  $p = .59$ , Student’s *t*-test, Figure 7C). The degree of plasticity was  
308 independent of whether Chr2 was excited near or far from synaptic terminals (Figure 7 –  
309 Supplemental Figure 1).

310

311 To analyze recovery from facilitation or depression, a test EPSC was evoked after a 20-pulse  
312 tetanus at time intervals increasing from 100 ms to 25.6 seconds (Figure 7A and E). This was  
313 repeated five to twenty times for each test pulse with a 30-second or greater gap between sweeps  
314 and the results were averaged. We fit recovery data with single exponential functions, and found  
315 that depression observed by VCN input recovered with a time-course ( $\tau_{20\text{ Hz}} = 3.5 \pm 0.7$  sec,  $\tau_{50}$   
316  $\text{Hz} = 3.1 \pm 0.4$  sec) comparable to the recovery from IC input facilitation ( $\tau_{20\text{ Hz}} = 4.5 \pm 1.4$  sec,  $\tau$

317 50 Hz =  $4.4 \pm 1.7$  sec, Figure 7E). While classical short-term facilitation lasts for only hundreds of  
318 milliseconds after tetanus stimuli (Zucker and Regehr, 2002), IC input facilitation onto MOC  
319 neurons lasted for tens of seconds. This longer-lasting facilitation resembles synaptic  
320 augmentation, which has a longer lifespan (seconds) than classical short-term facilitation  
321 (milliseconds) and a recovery time-course that is insensitive to the duration or frequency of  
322 repetitive activation (Magleby, 1987; Zucker and Regehr, 2002). Thus, while ascending and  
323 descending inputs to MOC neurons employ similar postsynaptic receptors, they differ  
324 dramatically in short-term plasticity.

325

326 *The onset and dynamic range of MOC neuron output is controlled by integrating facilitating and*  
327 *depressing inputs*

328 We showed above that the intrinsic properties of MOC neurons permit them to fire over a wide  
329 range. Moreover it has been previously shown that MOC neurons respond dynamically to a wide  
330 variety of binaural sound intensities and frequencies (Liberman and Brown, 1986; Brown, 1989;  
331 Lilaonitkul and Guinan, 2009), and thus we expect large variation in the number of presynaptic  
332 fibers driving their output. Given these results, we asked how do synaptic inputs from IC and  
333 VCN, with their distinct forms of short-term plasticity, fully engage the firing capacity of MOC  
334 neurons? Our opsin-dependent approach did not allow us to investigate how MOC neurons  
335 respond to this presynaptic variation, as one cannot independently control individual fibers in a  
336 large population, nor can Chr2 be reliably activated at high, physiological firing rates  
337 characteristic of auditory neurons. Thus, we examined how MOC neurons would respond to  
338 diverse inputs by injecting synaptic conductance waveforms modeled after physiological data  
339 (see Methods and Figure 8 – Supplemental Figure 1). To simulate the dynamic firing range of IC

340 and VCN neurons in response to *in vivo* acoustic stimuli (Ehret and Moffat, 1985; Rhode and  
341 Smith, 1986; Smith and Rhode, 1989; Kuwada et al., 1997; Ono et al., 2017), we generated low-  
342 rate (Figure 8Ai), and high-rate (Figure 8Aii) excitatory postsynaptic conductance (EPSC)  
343 waveforms, referred to as ~40 Hz and ~180 Hz, respectively. In mice, the total number of inputs  
344 to a single MOC neuron from any region is currently unknown. However, comparing average  
345 minimally stimulated light responses to maximal light responses from our *in vitro* data, we  
346 estimated that each MOC neuron in the brain slice receives an average of  $4.2 \pm 1.0$  unilateral  
347 inputs from the IC (maximum of 13.8,  $N = 15$ ), and  $11.1 \pm 2.4$  unilateral inputs from the VCN  
348 (maximum of 35.5,  $N = 15$ ). As these numbers were likely an underestimation due to our  
349 experimental preparation (e.g. dependence on virally induced ChR2 expression and damage of  
350 inputs during acute brain sectioning), our EPSC waveforms were varied to simulate a broad  
351 range of inputs (10, 20, 40 or 80). Additionally, each input's form of presynaptic short-term  
352 plasticity could be set to facilitating or depressing, based on our measured parameters. All of our  
353 modeled inputs simulated activity of neurons that tonically fire, as we hypothesize that this type  
354 of input is most likely to drive sustained responses in MOC neurons, for example, sustained  
355 choppers (T-stellate cells) from the VCN. The cellular identity and intrinsic properties of IC  
356 neurons that project to MOC neurons are currently unknown; however, since their nerve  
357 terminals in VNTB exhibit facilitation to repetitive presynaptic firing, it seems likely that these  
358 neurons may also exhibit tonic firing.

359

360 In response to a small number of facilitating inputs (labeled 'Fac' in the following figures) firing  
361 at ~40 Hz, few action potentials were evoked in MOC neurons ( $1.8 \pm 0.8$  for 10 inputs, and  $5.3 \pm$   
362  $1.5$  for 20 inputs,  $N = 6$ ) (Figure 8Bi, D, and E), and the first peak of postsynaptic firing

363 generally occurred hundreds of milliseconds after stimulus onset ( $271.1 \pm 74.4$  ms for 10 inputs,  
364 and  $183.8 \pm 59.0$  ms for 20 inputs,  $N = 6$ ) (Figure 8Bi, D, and F). With only 10 facilitating inputs  
365 at  $\sim 40$  Hz, 2 out of 6 MOC neurons failed to reach action potential threshold (e.g., first row of  
366 Figure 9C). MOC neurons responded to increasing numbers of facilitating inputs with a linearly  
367 increasing number of spikes during each stimulus for both  $\sim 40$  Hz and  $\sim 180$  Hz paradigms  
368 (Figure 8E). Facilitating EPSPs at  $\sim 180$  Hz generally elicited more action potentials with an  
369 earlier onset than  $\sim 40$  Hz EPSPs with the same number of inputs (Figure 8Bii, E, and F).  
370 Additionally, the slope (increase in number of spikes for a given increase in number of inputs) of  
371 linear fits to the data in Figure 8E also significantly increased with presynaptic firing rate; this  
372 slope will be referred to as firing sensitivity (FS). FS was  $0.31 \pm 0.06$  for 40 Hz and  $1.0 \pm 0.1$  for  
373 183 Hz ( $p = 6.7 \times 10^{-6}$ , paired samples Student's *t*-test). In a small number of experiments, an  
374 EPSP waveform would drive an MOC neuron into depolarization block toward the end of each  
375 trial, likely due to voltage-gated sodium channel inactivation (e.g., Figure 8D, 80 facilitating  
376 inputs at  $\sim 180$  Hz). When this occurred, we measured the average instantaneous frequency  
377 (spikes per second) of all action potentials before the onset of depolarization block whose  
378 amplitude surpassed a  $-20$  mV threshold, and divided this number by half to extrapolate the  
379 number of spikes per 500 ms (Figure 8E, 9D).

380

381 Similar to facilitating EPSPs, the majority of depressing EPSP waveforms (labeled 'Dep' in the  
382 figures) elicited action potentials that fired in a sustained manner (Figure 8Cii-E), and the FS in  
383 response to EPSP waveforms significantly increased with presynaptic firing rate (Figure 8E). FS  
384 was  $0.095 \pm 0.014$  for 40 Hz, and  $0.31 \pm 0.08$  for 180 Hz ( $p = 1.6 \times 10^{-4}$ , paired samples  
385 Student's *t*-test). Some MOC neurons failed to reach action potential threshold in response to

386 depressing waveforms at ~40 Hz (6/6 failures with 10 inputs, and 3/6 with 20 inputs), and ~180  
387 Hz (3/6 failures with 10 inputs) (e.g., last two rows of Figure 8D). When action potentials were  
388 elicited and the number of simulated inputs were equivalent, depressing waveforms at ~180 Hz  
389 always drove MOC neurons to threshold earlier than those at ~40 Hz (Figure 8F). At ~40 Hz,  
390 with 20 to 40 simulated inputs, depressing waveforms often elicited an onset response (Figure  
391 8Ci) that occurred earlier than facilitating waveforms at the same rate (Figure 8D and F). When  
392 the presynaptic firing rate was increased to ~180 Hz, facilitating waveforms with 10 to 20  
393 simulated inputs generally elicited an onset response sooner than with depressing inputs. As our  
394 previously described experiments demonstrated that inputs from IC facilitated and those from  
395 VCN depressed (Figure 7) our simulated inputs suggest that, individually, VCN inputs best drive  
396 slow rates of sustained activity in MOC neurons, and IC inputs best drive high-rates of activity.  
397 Combinations of these inputs are needed to access the full dynamic range of MOC neuron firing,  
398 as our simulated VCN-like (depressing) EPSGs could only drive the firing rate ( $47.8 \pm 5.9$  Hz  
399 average maximum,  $N = 6$ ) to about half of the maximum rates measured *in vivo* (Liberman,  
400 1988; Brown, 1989), while IC-like (facilitating) EPSGs could drive MOC neurons to fire at  
401 maximal rates ( $180 \pm 12$  Hz average maximum,  $N = 6$ ) more comparable to our *in vitro*  
402 experiments (Figure 2).

403

#### 404 *Descending input to MOC neurons can enhance or override ascending reflex input*

405 The output of MOC neurons *in vivo* depends on the integration of multiple input subtypes, where  
406 weaker ascending inputs may be optimized or overridden by more powerful descending inputs.  
407 To investigate how MOC neurons would respond to this type of integration, we injected EPSG  
408 waveforms simulating combinations of ascending (depressing) and descending (facilitating)

409 inputs. In order to avoid artificially introducing synchrony between the modeled VCN and IC  
410 inputs we introduced a third average presynaptic firing rate,  $\sim 110$  Hz (Figure 9A). Using the  
411  $\sim 180$  Hz paradigm, 20 depressing inputs elicited a low number of action potentials in MOC  
412 neurons, without any failures ( $5.5 \pm 1.4$  spikes on average,  $N = 6$ ) (Dashed grey line, Figure 9D),  
413 with the first action potential occurring at  $36.5 \pm 6.6$  ms after the stimuli onset (Dashed grey line,  
414 Figure 9E). To experimentally test how IC-like inputs altered this VCN-like response, we  
415 concurrently introduced 10 to 80 facilitating inputs at  $\sim 40$  Hz or  $\sim 110$  Hz (Figure 9). As  
416 expected, the number of action potentials evoked by facilitating or depressing input was  
417 increased when the both types were combined (Figure 9B-D). However, the magnitude of this  
418 effect was dependent on the strength of the facilitating input, as spikes evoked by weaker  
419 facilitating inputs ( $1.6 \pm 0.8$  spikes on average for 10 inputs at  $\sim 40$  Hz, and  $8.6 \pm 2.6$  spikes at  
420  $\sim 110$  Hz) were significantly enhanced when combined with the depressing paradigm ( $9.2 \pm 2.3$   
421 spikes at  $\sim 40$  Hz,  $16.1 \pm 3.1$  spikes at  $\sim 110$  Hz) ( $p = .022$  at  $\sim 40$  Hz, and  $p = .0034$  at  $\sim 110$  Hz,  
422 paired samples Student's *t*-test), whereas stronger facilitating inputs were not enhanced (for  
423 example,  $67.3 \pm 8.0$  spikes on average for 80 inputs at  $\sim 110$  Hz versus  $68.7 \pm 0.4$  when  
424 combined) (Figure 9D). Thus, our modeled facilitating IC inputs effectively drive MOC firing,  
425 and input from depressing VCN synapses only enhanced firing when the IC input was relatively  
426 weak.

427

428 Combining facilitating and depressing inputs is expected to impact the timing of postsynaptic  
429 action potentials, and so we also examined the onset time of firing. At  $\sim 40$  Hz, the onset of the  
430 first action potential evoked by facilitating inputs occurred earlier when combined with the  
431 depressing paradigm, but the strength of this effect decreased with increasing number of



432 facilitating inputs (Figure 9E). The same was true of ~110 Hz facilitating inputs when simulating  
433 only 10 or 20 inputs. However, there was little difference as the number of inputs increased. The  
434 FS of facilitating inputs ( $0.32 \pm 0.06$  at ~40 Hz, and  $0.82 \pm 0.18$  at ~110 Hz) was not  
435 significantly altered with the addition of a depressing input ( $0.30 \pm 0.09$  at ~40 Hz, and  $0.74 \pm$   
436  $0.12$  at ~110 Hz,  $N = 5$ ) ( $p = .38$  at ~40 Hz, and  $p = .088$  at ~110 Hz, paired samples Student's *t*-  
437 test) (Figure 9D), demonstrating that MOC neurons generally summate concurrent inputs, and  
438 confirming that they linearly respond to signals in proportion to the intensity of their input  
439 (Figure 2). Overall, these results suggest that relatively weak descending inputs to MOC neurons  
440 are enhanced when combined with ascending input, while relatively strong descending inputs  
441 override ascending input—evoking an equivalent amount of spikes with similar onset, whether  
442 or not the ascending input is active. The data therefore confirm the potency of the descending  
443 control of the MOC system, as compared to the reflex pathway.

444

#### 445 **Discussion:**

446 In the present study, we contrasted excitatory inputs onto MOC neurons through two distinct  
447 sources, an ascending, reflex pathway, and a descending pathway from the midbrain. Few studies  
448 have explored the properties of MOC neurons, in part due to the difficulty of identifying the  
449 neurons in mature, heavily myelinated tissue. In order to overcome previous limitations and  
450 visualize MOC neurons in acute brain sections from older mice, we utilized a ChAT-Cre mouse  
451 line which genetically marks cholinergic neurons in the SOC. This line was recently  
452 characterized by Torres Cadenas et al., (2019), where it was shown to label cholinergic MOC  
453 efferent neurons. Using CTB mediated retrograde tract tracing originating from the inner-ear, we  
454 were able to confirm and expand on their results. Agreeing with classic anatomical tract tracer

455 studies of MOC neurons (for review see Warr, 1992), we demonstrated that approximately two  
456 thirds of ChAT-Cre/tdTomato positive VNTB neurons project to contralateral cochlea, whereas  
457 one third project to ipsilateral cochlea. Additionally, retrogradely labeled VNTB neurons were  
458 always positive for tdTomato, confirming that the ChAT-Cre mouse line expressed Cre  
459 recombinase in most, if not all, MOC efferent neurons in the VNTB.

460

#### 461 *Firing rates of MOC neurons*

462 Our examination of intrinsic properties of MOC neurons revealed a remarkable capacity to  
463 encode the intensity of current steps with a linear increase in postsynaptic firing over a wide  
464 range. Further, we showed that this linearity is recapitulated in the responses to synaptic activity,  
465 as modeled through conductance clamp. Previous work by Fujino et al. (1997) reported MOC  
466 and LOC neuron intrinsic membrane properties of neonatal rats (P3-9). However, due to the  
467 difficulty of visualizing brainstem neurons in older animals with tract tracers, they were not able  
468 to record from MOC neurons after the onset of hearing (P12-14). Additional studies on MOC  
469 neurons that used whole-cell recording and tract tracing were also limited to younger animals  
470 near or prior to onset of hearing (Wang and Robertson, 1997; Mulders and Robertson, 2001).  
471 Consistent with properties described in prehearing rats (Fujino et al., 1997), we reported that a  
472 majority of matured MOC neurons did not spontaneously fire, and that their spike frequency  
473 linearly increased with intensity of injected current pulses. This conclusion is supported by *in*  
474 *vivo* recordings at the level of the auditory nerve, where MOC efferents exhibit little-to-no  
475 spontaneous firing, and respond linearly to increasing sound intensity (Cody and Johnstone,  
476 1982; Robertson, 1984; Robertson and Gummer, 1985). A recent study (Torres Cadenas et al.,  
477 2019) reported that MOC neurons from P12-23 mice exhibited spontaneous firing, which may be

478 due to developmental changes specific to mice (we recorded from P30-48), or due to differences  
479 in acute brain slice preparation. Developmental transcriptomics of auditory efferent neurons  
480 could reveal the basis for these changes.

481

482 Intriguingly, *in vivo* recordings rarely report sound-driven firing rates in MOC efferents above  
483 100 Hz, yet we report that many MOC neurons are able to fire action potentials at rates greater  
484 than 250 Hz in response to somatic current injections. The high firing rates achieved *in vitro* may  
485 better reflect MOC neuron capabilities, as *in vivo* experiments are often performed with  
486 anesthetics that produce extensive systemic changes in neurotransmission. An alternative  
487 interpretation is that the wide firing range intrinsic to MOC neurons ensures that over the  
488 narrower range used *in vivo*, the linearity of input-output relations remains preserved. MOC  
489 neurons are known to receive modulatory inputs from adrenergic, serotonergic and peptidergic  
490 sources (Thompson and Thompson, 1995; Woods and Azeredo, 1999; Mulders and Robertson,  
491 2000, 2001; Thompson and Schofield, 2000; Horvath et al., 2003), and can be excited by a  
492 handful of neuromodulators (Wang and Robertson, 1997, 1998). This suggest that sound-driven  
493 firing rates in MOC neurons observed *in vivo* may be contextually enhanced by activation of  
494 neuromodulatory inputs.

495

496 *Excitatory MOC neuron inputs utilize fast-gating CP-AMPARs*

497 The ability of the MOC system to dampen cochlear sensitivity likely depends on the convergence  
498 of excitatory synaptic inputs from ascending and descending brain regions. Tract-tracer and  
499 lesion studies have determined that ascending projections originate from the posteroventral  
500 cochlear nucleus (Thompson and Thompson, 1991; De Venecia et al., 2005; Darrow et al., 2012;

501 Brown et al., 2013). These ascending projections are involved in the reflex MOC pathway, and  
502 are likely mediated by T-stellate neurons. However, bushy cells may also play a role, as they  
503 send axon collaterals which terminate in VNTB, the primary location of MOC neuron somata  
504 (Smith et al., 1991). Descending projections to MOC neurons originate from auditory and non-  
505 auditory regions, including brainstem, IC, thalamus and cortex (Thompson and Thompson, 1993;  
506 Vetter et al., 1993; Mulders and Robertson, 2002). The IC is a major source of dense,  
507 tonotopically arranged, glutamatergic projections to ipsilateral VNTB (Thompson and  
508 Thompson, 1993; Saint Marie, 1996; Suthakar and Ryugo, 2017) where the majority of IC  
509 projections terminate (Terreros and Delano, 2015; Cant and Oliver, 2018), and their targets  
510 include MOC neurons.

511

512 In the present study, we elucidated pre- and postsynaptic properties of excitatory VCN and IC  
513 inputs onto MOC neurons by using nucleus- and cell-specific virally-driven optogenetic  
514 excitation. We demonstrated that MOC neurons receive excitatory input from VCN and IC, both  
515 of which transmit using fast-gating CP-AMPA receptors. Together with somatic puff application of  
516 glutamate and mEPSC analysis, our investigation revealed that inwardly rectifying, fast-gating  
517 CP-AMPA receptors are a fundamental postsynaptic feature of excitatory synaptic transmission at MOC  
518 neurons.

519

520 The utilization of GluR2-lacking AMPARs, with ultra-fast mEPSC decays (less than 200  $\mu$ s), is  
521 reminiscent of auditory nerve synapses in the VCN, including those onto T-stellate cells  
522 (Gardner et al., 1999, 2001). Higher regions of the auditory pathway typically lack this feature of  
523 the synapse, even in the adjacent medial nucleus of the trapezoid body, whose mEPSCs are

524 slower than in MOC neurons and likely contain GluR2 (Koike-Tani et al., 2005; Lujan et al.,  
525 2019). We do not know if the mEPSCs originated from synapses made by VCN or IC neurons or  
526 both, but the uniformity of mEPSC properties suggests that even descending fibers from IC can  
527 trigger insertion of such fast-gating receptors. While the presence of fast kinetic receptors is  
528 considered to be an adaptation to preserve microsecond precision of sensory timing (Gardner et  
529 al., 1999), it seems unlikely that such precise timing is needed in the efferent system. Further  
530 studies are needed to examine how receptor channel kinetics impact the integrative functions of  
531 the MOC neuron.

532

### 533 *T-stellate neurons are an MOC reflex interneuron*

534 Neurons identified as T-stellate cells are believed to terminate in VCN, DCN, olivary nuclei,  
535 lemniscal nuclei, and IC (Warr, 1995; Oertel et al., 2011), but it is not clear if axons of the same  
536 neuron can have such diverse projections. Using an intersectional AAV approach, we directly  
537 demonstrated that T-stellate neurons drive activity in MOC neurons, consistent with suggestions  
538 from previous anatomical and lesion studies (Thompson and Thompson, 1991; De Venecia et al.,  
539 2005; Darrow et al., 2012). T-stellate projections and terminals in many known target nuclei  
540 were consistently observed in brain sections prepared for microscopy (Figure 4—Supplemental  
541 Figure 1). Nevertheless, eliciting a post-synaptic current was qualitatively difficult when  
542 compared to non-specific virally mediated ChR2 expression in the VCN. This was possibly due  
543 to sparse ChR2 expression among T-stellate neurons resulting from the requirement of  
544 coincident infection by two different viruses in the same neuron; alternatively, ChR2 expression  
545 may have been too low to consistently reach action potential threshold using the intersectional  
546 AAV scheme. There also may be sub-populations of T-stellate neurons which project to MOC

547 neurons and do not project to the IC; non-IC projecting T-stellate neurons would not express  
548 ChR2 using this intersectional virus approach. Nevertheless, this approach highlights the  
549 enormous range of targets of these neurons, as at least a subset of IC projecting T-stellate  
550 neurons also directly synapsed onto MOC neurons. Genetic manipulation of only T-stellate  
551 neurons with this dual AAV approach will be useful in future studies to help elucidate functional  
552 significance of T-stellate projections in other auditory circuits.

553

#### 554 *Effect of short-term synaptic plasticity on MOC neuron output*

555 Neurons throughout the brain receive mixtures of synaptic inputs that vary not only in their  
556 origin or information content, but their short-term plasticity. A prominent example is that of  
557 cerebellar Purkinje neurons, whose parallel fiber inputs facilitate while climbing fiber inputs  
558 depress (Sakurai, 1987; Hansel and Linden, 2000). The physiological functions served by this  
559 diversity likely vary with brain region. In MOC neurons, we found that synaptic responses  
560 having properties of the ascending or descending inputs alone were not capable of encoding  
561 firing over a wide range and with short latency. However by combining these different types of  
562 input and varying input number and firing rate, sustained MOC output could vary over 20-fold.  
563 We suggest that this central synaptic mechanism could aid in grading the level of efferent  
564 dampening of cochlear function according to sound level.

565

566 Inputs from IC strengthened considerably for tens of seconds with repetitive presynaptic  
567 stimulation, resulting in a facilitation that resembles the augmentation seen at neuromuscular  
568 junction (Magleby and Zengel, 1976) (Figure 7), whereas VCN and T-stellate inputs (Figure 4G)  
569 decreased in synaptic strength, resulting in acute short-term depression. Both forms of plasticity

570 recovered with a similar time course, suggesting that conditioning of these synapses could have  
571 lasting effects, and bias efferent signaling towards top-down control. The depression of VCN  
572 inputs to MOC neurons is not likely due to desensitization of ChR2, since trains of light pulses  
573 triggered reliable spikes in VCN neurons. Moreover, injections into IC were made with the same  
574 virus, and those inputs never exhibited depression. Thus, distinct forms of presynaptic plasticity  
575 are likely exhibited by IC and VCN inputs to the same cell type. Depression of VCN inputs is  
576 surprising, given that they mediate a reflex pathway and one might therefore expect reliability  
577 within such a circuit. Moreover, as with MOC neurons, T-stellate neurons fire action potentials  
578 in a relatively sustained manner in response to sound stimuli. In *in vivo* recordings at the level of  
579 the auditory nerve, MOC neurons respond to sound input with latencies as short as 5  
580 milliseconds (Robertson and Gummer, 1985; Liberman and Brown, 1986), and T-stellate cells  
581 are well suited to provide the rapid onset portion of this response, as demonstrated in our  
582 simulation of this input (Figure 8). However, our results suggest that for sustained activity of  
583 MOC efferents, non-VCN inputs, such as from the IC, may be a necessary component of efferent  
584 control of cochlear function. Indeed, a recent auditory system computational model suggested  
585 that descending IC inputs to the MOC system are necessary for persistent enhancement of signal  
586 in noise, and that the MOC system functions across a broad range of intensity (Farhadi et al.,  
587 2021). These features of the model are now affirmed by our observations of potent input from  
588 IC, dependent on synaptic augmentation, and the intrinsic properties of MOC neurons that  
589 support a remarkably wide dynamic range. Moreover, we suggest that the stable, excitatory  
590 control of efferent neurons by descending input raises the possibility that regulation of cochlear  
591 sensitivity may be under rapid control associated with attention (Delano et al., 2007; Wittekindt  
592 et al., 2014), preceding sounds (Otsuka et al., 2018), or other changes in brain state.

593

594 **Materials and Methods:**

595 *Animals*

596 Transgenic mice of both sexes expressing Cre recombinase under the endogenous choline  
597 acetyltransferase promoter (ChAT-IRES-Cre, Jackson Labs 006410) (Rossi et al., 2011) were  
598 crossed to a tdTomato reporter line (Ai9(RCL-tdT), Jackson Labs 007909) to generate mice  
599 expressing tdTomato in cholinergic neurons (referred to as ChAT-Cre/tdTomato). A small  
600 fraction of ChAT-Cre/tdTomato mice exhibit ectopic expression of Cre recombinase, which  
601 labels vasculature and astrocytes (<https://www.jax.org/strain/006410>). When ectopic expression  
602 was observed, the slices were not used for experimental data. Mouse lines were maintained in an  
603 animal facility managed by the Department of Comparative Medicine at Oregon Health and  
604 Science University. All procedures were approved by the Oregon Health and Science  
605 University's Institutional Animal Care and Use Committee and met the recommendations of the  
606 Society for Neuroscience.

607

608 *Immunohistochemistry and imaging*

609 Mice were deeply anesthetized with isoflurane and then perfused through the heart with 0.1 M  
610 phosphate buffered saline (PBS), pH 7.4, 33 °C, followed by ice-cold 4% paraformaldehyde in  
611 0.1 M PBS using a peristaltic pump. Brains were surgically extracted and incubated with 4%  
612 paraformaldehyde in 0.1 M PBS overnight at 4°C. Brains were washed in 0.1 M PBS three  
613 times, 10 minutes per wash, and then 50- $\mu$ m sections were made on a vibratome (Leica,  
614 VT1000S) and saved as floating sections in 0.1 M PBS. To visualize cells that were filled with  
615 biocytin during whole-cell recording, 300- $\mu$ M acute brain slices were fixed with 4%



616 paraformaldehyde in 0.1 M PBS overnight at 4°C. Sections used for antibody labeling were  
617 permeabilized and blocked in 2% bovine serum albumin, 2% fish gelatin, 0.2% Triton X-100 in  
618 0.1 M PBS for two hours at room temperature on a 2-D rocker. Sections were then incubated in  
619 primary antibodies for two days at 4°C on a 2-D rocker. Sections were washed in 0.1 M PBS  
620 three times, 10 minutes per wash, and then incubated in secondary antibodies and streptavidin-  
621 conjugated fluorophores for two days at 4°C on a 2-D rocker. See Key Resources table for a full  
622 list of antibodies and reagents used. Sections were washed in 0.1 M PBS three times, 10 minutes  
623 each wash, followed by incubation in 4% paraformaldehyde in 0.1 M PBS for 30 minutes. Some  
624 brain sections with high fluorophore expression were not enhanced with antibody labeling to  
625 reduce background. All sections were mounted on microscope slides and coverslipped with  
626 Fluoromount-G (SouthernBiotech) mounting medium, then sealed with clear nail polish. All  
627 images of histological sections were acquired on a Zeiss LSM780 confocal microscope system.  
628 Images were processed for contrast, brightness and gamma using Fiji (Schindelin et al., 2012).

629

### 630 *Acute brain slice preparation*

631 Mice were deeply anesthetized with isoflurane and decapitated. The brain was rapidly extracted  
632 while submerged in warm (40°C) artificial cerebral spinal fluid (aCSF) containing (in mM): 130  
633 NaCl, 2.1 KCl, 1.2 KH<sub>2</sub>PO<sub>4</sub>, 3 Na-HEPES, 11 glucose, 20 NaHCO<sub>3</sub>, 1 MgSO<sub>4</sub>, 1.7 CaCl<sub>2</sub>,  
634 bubbled with 5% CO<sub>2</sub>/95% O<sub>2</sub>. Parasagittal and coronal sections of brain containing the superior  
635 olive, cochlear nucleus, or inferior colliculus were cut at 300 µm with a vibratome (VT1200S,  
636 Leica, or 7000smz-2, Campden) in warm aCSF. Throughout sectioning, brain slices were  
637 collected and stored in aCSF at 31°C. When sectioning was completed slices were incubated an  
638 additional 30 minutes at 31°C, followed by storage at room temperature, ~23°C.

639

640 *Electrophysiology*

641 Acute brain slices were transferred to a recording chamber and submerged in aCSF. Slices were  
642 anchored to the chamber using a platinum harp with nylon threads and placed on a fixed stage  
643 microscope (Axioskop 2 FS Plus, Zeiss). The recording chamber was perfused with aCSF at 3  
644 ml/minute, and maintained at 31-33°C with an in-line heater (TC-344A, Warner Instrument  
645 Corp). Neurons in each slice were viewed using full-field fluorescence with a white-light LED  
646 attached to the epifluorescence port of the microscope that was passed through a tdTomato filter-  
647 set with a 40X water-immersion objective (Zeiss), and a digital camera (Retiga ELECTRO,  
648 QImaging). In slices from ChAT-Cre/tdTomato mice, MOC neurons were identified in the  
649 VNTB by their tdTomato fluorescence and morphology. Borosilicate glass capillaries (OD 1.5  
650 mm, World Precision Instruments) were pulled on a P-97 Flaming/Brown micropipette puller  
651 (Sutter) to a tip resistance of 1-5 M $\Omega$ . All whole-cell current-clamp experiments were conducted  
652 with an internal pipette solution containing (in mM): 113 K-gluconate, 2.75 MgCl<sub>2</sub>, 1.75 MgSO<sub>4</sub>,  
653 9 HEPES, 0.1 EGTA, 14 tris-phosphocreatine, 0.3 tris-GTP, 4 Na<sub>2</sub>-ATP, pH adjusted to 7.2 with  
654 KOH, and osmolality adjusted to 290 mOsm with sucrose. Whole-cell voltage-clamp  
655 experiments were conducted using a K-gluconate-based pipette solution, or a cesium-based  
656 pipette solution (in mM): 103 CsCl, 10 TEA-Cl, 3.5 QX-314-Cl, 2.75 MgCl<sub>2</sub>, 1.74 MgSO<sub>4</sub>, 9  
657 HEPES, 0.1 EGTA, 0.1 spermine, 14 tris-phosphocreatine, 0.3 tris-GTP, 4 Na<sub>2</sub>-ATP, with pH  
658 adjusted to 7.2 with CsOH, and osmolality adjusted to 290 mOsm with sucrose. All IV-relation  
659 experiments used a cesium-based pipette solution. Polyamine-free cesium-based pipette solutions  
660 omitted spermine. Reported voltages are corrected for their liquid junction potential: -12.4 mV  
661 for K-gluconate based pipette solution and -2.8 mV for cesium-based pipette solution. Loose-

662 patch recordings were conducted with aCSF as the pipette solution. In some experiments, 0.1%  
663 biocytin (B1592, Thermo Fisher Scientific) was added to the pipette solution for post-hoc  
664 identification of MOC neurons. Whole-cell recordings were amplified (5X gain), low-pass  
665 filtered (14 kHz Bessel, Multiclamp 700B, Molecular Devices) and digitized using pClamp  
666 software (50-80 kHz, Digidata 1440A, Molecular Devices). Series resistance compensation was  
667 set to 60% correction and prediction with a bandwidth of 1.02 kHz. The majority of pipettes used  
668 for voltage clamp were wrapped with Parafilm M (Bemis) to reduce pipette capacitance. Cells  
669 were voltage-clamped at -62.8 mV unless noted otherwise. The average series resistance ( $R_s$ )  
670 when patched onto a neuron was  $14.5 \pm 0.9 \text{ M}\Omega$ . 1-mM glutamate in aCSF was puffed onto cells  
671 from a patch-pipette attached to a Picospritzer II (Parker). The puff pressure was adjusted  
672 between 5-10 psi, and 2-15 msec duration to achieve glutamate-evoked currents. Example  
673 current traces are baselined to zero pA unless noted otherwise. ChR2 was activated using 2-ms  
674 flashes of light through a GFP filter set from a 470 nm LED attached to the epifluorescence port  
675 of the microscope. Light stimulation was made through a 40X water immersion objective  
676 (Zeiss). At some synapses, ChR2 stimulation can exhibit artificial synaptic depression (Jackman  
677 et al., 2014). To confirm that light-evoked short-term plasticity observed from activation of  
678 MOC neuron inputs were not an artifact of ChR2 stimulation at presynaptic boutons (i.e. action  
679 potential broadening, increasing the probability of vesicle release), light stimulation was  
680 compared over input axons and MOC neuron somata (Figure 7—Supplemental Figure 1). In  
681 sagittal sections, moving the objective lens away from the recorded neuron and toward the IC in  
682 230  $\mu\text{m}$  steps delayed the onset of light-evoked EPSCs. No EPSC could be evoked when light  
683 stimulation was directly ventral to the recorded neuron where there was an absence of brain  
684 tissue, confirming that light stimulation was confined to the location of the objective lens. A plot

685 of change in EPSC delay over camera position was best fit with a linear equation and the axon  
686 velocity was calculated to be 0.571 meters per second (Figure 7—Supplemental Figure 1C).  
687 Similar short-term plasticity was observed with both axonal and somatic stimulation (Figure 7—  
688 Supplemental Figure 1D).

689

### 690 *Miniature EPSC analysis*

691 Miniature EPSCs were recorded in the presence of 1  $\mu\text{M}$  tetrodotoxin (TTX) to block  
692 spontaneous spike-driven events, 0.5  $\mu\text{M}$  strychnine and 10  $\mu\text{M}$  SR95531 to block inhibitory  
693 receptors, and 10  $\mu\text{M}$  MK-801 to block NMDA receptors. Spontaneous miniature events were  
694 detected using a template search function in AxoGraph (1.7.4) from continuously collected data  
695 that was stable for more than 3 min. Events were captured and aligned by their onset, and then  
696 the average amplitude, time course, and inter-event interval was calculated. Events that appeared  
697 artificial or contained multiple EPSCs were rejected by eye. The decay of average mEPSC data  
698 was analyzed in Igor Pro 8 (WaveMetrics) and fit with a double exponential equation,

699  $I(t) = A_{fast} \exp\left(\frac{-t}{\tau_{fast}}\right) + A_{slow} \exp\left(\frac{-t}{\tau_{slow}}\right)$ , where  $I(t)$  is the current as a function of time,

700  $\tau_{fast}$  and  $\tau_{slow}$  reveal fast and slow decay time constants, and  $A_{fast}$  and  $A_{slow}$  their relative  
701 amplitudes.

702

### 703 *Conductance clamp*

704 To accurately record membrane voltage while simultaneously injecting conductance waveforms,  
705 individual MOC neurons were patched simultaneously with two recording electrodes in whole-  
706 cell configuration, both containing K-gluconate based pipette solution (Figure 8—Supplemental  
707 Figure 1). One electrode served as a voltage follower while the other injected current, thereby

708 avoiding the possibility of distortion of fast waveforms by voltage drop across the series  
709 resistance or of capacity transients. Conductance clamp experiments were recorded in the  
710 presence of aCSF containing 0.5  $\mu\text{M}$  strychnine, 10  $\mu\text{M}$  SR95531, 10  $\mu\text{M}$  MK-801 and 5  $\mu\text{M}$   
711 NBQX to block all major inhibitory and excitatory inputs. Simulated excitatory postsynaptic  
712 conductance waveforms (EPSCs) were injected using an analog conductance injection circuit,  
713 Synaptic Module 1 (SM-1) (Cambridge Conductance), driven by a digital computer. The SM-1  
714 unit was set to rectifying mode and  $E_{\text{rev}}$  was set to +10 mV, to simulate MOC neuron CP-  
715 AMPARs (Fig. 3F and 5E).

716

717 Conductance waveforms were created using Igor Pro 8 and modeled using physiological data.  
718 Whole-cell recordings were made from MOC neurons in the presence of 0.5 nM strychnine, 10  
719  $\mu\text{M}$  SR95531, and 10  $\mu\text{M}$  MK-801 to isolate AMPAR mediated EPSCs. ChR2-positive IC or  
720 VCN input was minimally stimulated (~50% chance of evoking an EPSC) using a Lambda  
721 TLED light source (Sutter) to reveal unitary responses. Unitary responses were measured to have  
722 a maximum conductance ( $G_{\text{max}}$ ) of  $0.40 \pm 0.01$  nS for IC inputs ( $N = 3$ ), and  $0.46 \pm 0.06$  nS for  
723 VCN inputs ( $N = 3$ ). Thus, simulated unitary EPSCs were set to a  $G_{\text{max}}$  of 0.40 nS for synapses  
724 modeling short term facilitation (IC input) or 0.46 nS for those modeling short term depression  
725 (VCN input) (Fig. 8 and 9). The unitary EPSC waveform,  $EPSC(t) = (1 - e^{\frac{-t}{\tau_{\text{rise}}}}) \times (e^{\frac{-t}{\tau_{\text{decay}}}})$ ,  
726 was based on a fit to averaged EPSCs from IC and VCN, with  $\tau_{\text{rise}} = 0.27$  ms, and  $\tau_{\text{decay}} = 1.9$  ms.  
727 Timing and frequency of EPSCs were convolved to action potential timing from T-stellate cells  
728 in response to repeated 500-ms current injections, and each repetition (trial) was considered an  
729 input (Fig. 8A and 9A). T-stellate cells were identified by virally mediated retrograde labeling  
730 (AAVrg-pmSyn1-EBFP-Cre) (Fig. 4) from the contralateral IC in Ai9(RCL-tdT) mice. For each

731 individual input, short term plasticity was simulated in a frequency invariant manner by  
732 weighting  $G_{\max}$  of unitary EPSPs according to exponential fits of physiological data (Fig. 7D).  
733 For short term facilitation,  $EPSP_0 = G_{\max}$ , and  $EPSP_n = G_{\max} (Fac_{\max} + Ae^{-\frac{(n-n_0)}{\tau}})$ , where  
734  $Fac_{\max} = 2.43$ ,  $\tau = 12.9$  and  $A = -1.42$ . For short term depression,  $EPSP_0 = G_{\max}$ , and  $EPSP_n =$   
735  $G_{\max} (Dep_{\max} + A_1 e^{-\frac{(n-n_0)}{\tau_1}} + A_2 e^{-\frac{(n-n_0)}{\tau_2}})$ , where  $Dep_{\max} = 0.309$ ,  $\tau_1 = 0.771$ ,  $A_1 = 0.443$ ,  $\tau_2 =$   
736  $4.10$ , and  $A_2 = 0.248$ .

737

### 738 *Stereotactic injections*

739 Glass capillaries (WireTrol II, Drummond Scientific) were pulled on a P-97 Flaming/Brown  
740 micropipette puller (Sutter) and beveled to 45-degree angle with a tip diameter of 30-40  $\mu\text{m}$   
741 using a diamond lapping disc (0.5  $\mu\text{m}$  grit, 3M). Mice (P22-24) were anesthetized with  
742 isoflurane (5% induction, 1.5-2% maintenance) and secured in a small stereotaxic frame (David  
743 Kopf). While mice were under isoflurane anesthesia, viral injections were made with a single-  
744 axis manipulator (MO-10, Narishige) and pipette vice (Ronal) attached to a triple axis motorized  
745 manipulator (IVM Triple, Scientifica). After application of 10% povidone iodine, the scalp was  
746 cut, and the head was leveled using bregma and lambda. The lateral-medial axis was leveled by  
747 focusing a 10X objective 2-mm lateral from lambda to be in the same focal plane on the left and  
748 right skull. The location of IC was visually detected after removing a 1-mm<sup>2</sup> unilateral section of  
749 occipital bone directly caudal to the lambdoid suture and was pressure injected at a depth of 1  
750 mm. After removing a 1 mm caudal by 2 mm lateral unilateral section of occipital bone caudal to  
751 the lambdoid suture, the VCN was located by stereotactic coordinates (0.7 mm lateral, 0.95 mm  
752 rostral, and 4.0 mm depth) starting from the surface junction point of the IC, cerebellar lobule  
753 IV-V and simple lobule, which is often marked by a Y-shaped branch from the transverse sinus.

754 Post-injection, the incision was closed with nylon sutures. Experiments were conducted 1-3  
755 weeks post-surgery.

756

#### 757 *Posterior semi-circular canal injections*

758 Our protocol was adapted from Suzuki et al., (2017), who developed a procedure to deliver viral  
759 vectors to the cochlea via the posterior semi-circular canal (PSCC) which minimizes auditory  
760 system damage. Briefly, mice were anesthetized and secured to a stereotaxic frame in a manner  
761 identical to stereotaxic injections, and then rotated 90 degrees onto their side. A small post-  
762 auricular incision was made and muscle tissue overlying the temporal bone was dissected to  
763 reveal the bony wall of the PSCC. A small hole was made in the PSCC using a 26-gauge  
764 hypodermic needle (Kendall), and lymphatic fluid was allowed to drain for 5 minutes. The tip of  
765 a small polyethylene tube (PE-10) attached to a pipette vice (Ronal) containing cholera toxin  
766 subunit B (CTB, 0.5 % in 0.05 M Tris, 0.2 M NaCl, 0.001 M NaEDTA, 0.003 M NaN<sub>3</sub>, pH 7.5)  
767 was placed into the PSCC oriented toward the ampulla, and sealed with fragments of muscle and  
768 cyanoacrylate glue (3M Vetbond Tissue Adhesive). One to two microliters of CTB was injected  
769 into the PSCC, and the polyethylene tube was left in place for an additional 5 minutes. After  
770 removing the polyethylene tube, the hole was plugged with small pieces of muscle and covered  
771 with cyanoacrylate glue. The skin was closed with nylon sutures and mice were perfused for  
772 histochemistry 1-5 days later.

773

#### 774 *Experimental design and statistical analysis*

775 Electrophysiological traces were analyzed with pClamp 10.7 (Molecular Devices) and IGOR Pro  
776 8 (Wavemetrics) using the NeuroMatic 3.0 package (Rothman and Silver, 2018). Miniature

777 events were analyzed with Axograph 1.7.4 (Clements and Bekkers, 1997) and IGOR Pro 8.  
778 Averages are represented as mean  $\pm$  SEM. Statistical analysis was conducted with IGOR Pro 8,  
779 and significance between group means were examined using a two-way analysis of variance  
780 (ANOVA) test with a *post-hoc* Tukey test to identify means that significantly differed. Two-  
781 tailed Student's *t*-test was used for comparison between two means. The significance threshold  
782 was set at  $p < .05$  for all statistical tests. Figures were created with IGOR Pro 8 and Adobe  
783 Illustrator (CS2).



Table 1

784 **Table 1. Decay time constants for evoked and miniature EPSCs.**

|                                         | Double exponential |                    |                     |                    |                     |                  | Single exponential |
|-----------------------------------------|--------------------|--------------------|---------------------|--------------------|---------------------|------------------|--------------------|
|                                         | $\tau_{fast}$ (ms) | $\tau_{slow}$ (ms) | $A_{fast}$ (pA)     | $A_{slow}$ (pA)    | $\%A_{fast}$ (*100) | $\tau_w$ (ms)    | $\tau$ (ms)        |
| <b>VCN input</b><br><i>N</i> = 12       | 0.75 ± 0.26 (7)    | 4.11 ± 0.86 (7)    | -78.63 ± 21.10 (7)  | -37.98 ± 13.10 (7) | 70.79 ± 0.25 (7)    | 1.59 ± 0.25 (7)  | 2.22 ± 0.68 (5)    |
| <b>T-stellate input</b><br><i>N</i> = 4 | 0.62 (1)           | 3.32 (1)           | -131.60 (1)         | -54.12 (1)         | 70.86 (1)           | 1.19 (1)         | 1.73 ± 0.57 (3)    |
| <b>IC input</b><br><i>N</i> = 28        | 0.63 ± 0.09 (13)   | 3.43 ± 0.30 (13)   | -73.09 ± 16.55 (13) | -45.44 ± 9.13 (13) | 60.64 ± 5.00 (13)   | 1.72 ± 0.22 (13) | 2.09 ± 0.28 (15)   |
| <b>mEPSC</b><br><i>N</i> = 3            | 0.17 ± 0.01 (3)    | 1.72 ± 0.43 (3)    | -47.07 ± 5.36 (3)   | -5.63 ± 1.37 (3)   | 89.04 ± 3.00 (3)    | 0.32 ± 0.02 (3)  | N/A                |

785  $\tau_w = \tau_{fast} * \%A_{fast} + \tau_{slow} * (1 - \%A_{fast})$ ,  $\%A_{fast} = \frac{A_{fast}}{A_{fast} + A_{slow}}$ . Number of cells per data

786 point denoted as (*N*).

Figure 1

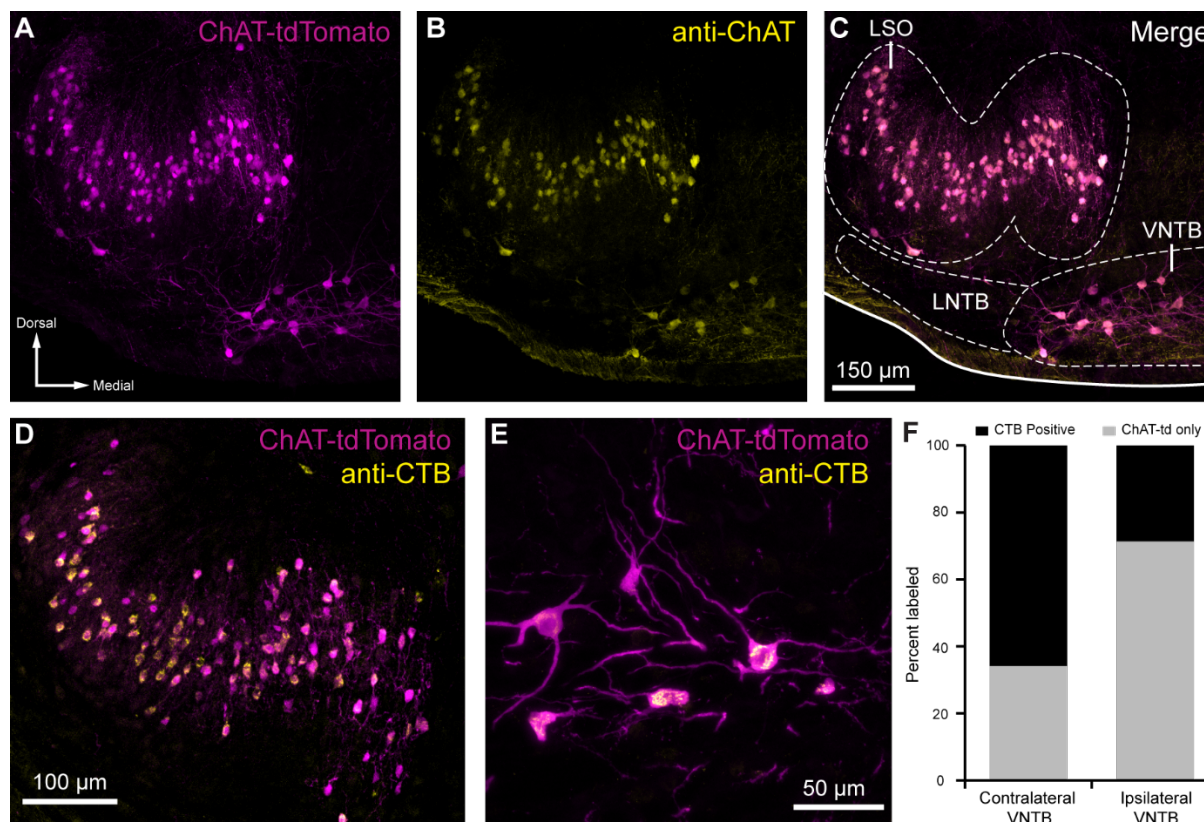

787

788 **Figure 1. Cholinergic auditory efferent neurons identified with the retrograde tracer CTB**

789 **were tdTomato-positive in ChAT-Cre/tdTomato mice.**

790 (A) ChAT-Cre/tdTomato positive neurons in the LSO and VNTB of the superior olivary

791 complex co-label with anti-ChAT antibody (B) confirming they are cholinergic neurons (C).

792 ChAT-Cre/tdTomato positive neurons in the ipsilateral LSO (D) and contralateral VNTB (E)

793 were retrogradely labeled by cochlear CTB injections.

794 (F) Contralateral to cochlear CTB injections, 66.1 % of ChAT-Cre/tdTomato positive VNTB

795 neurons were labeled. In ipsilateral VNTB, 28.9 % of ChAT-Cre/tdTomato positive neurons

796 were labeled ( $N = 3$  mice, 205 cells).

797 Abbreviations: lateral nucleus of the trapezoid body (LNTB)

Figure 2

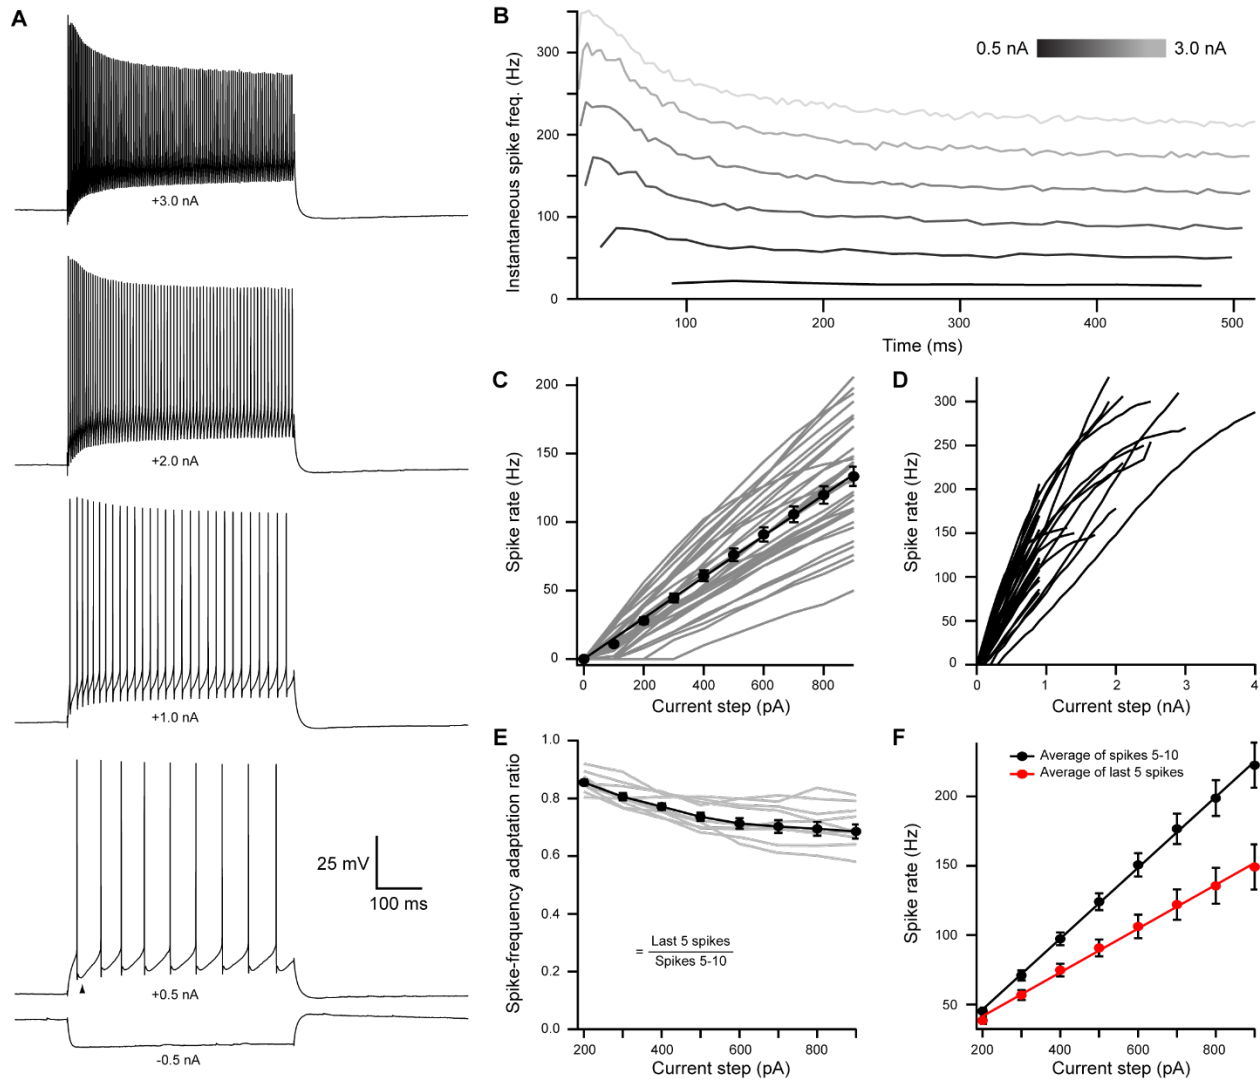

798

799 **Figure 2. Medial olivocochlear neurons accurately encoded stimulus intensity and duration.**

800 (A) Whole-cell current-clamp recording example of MOC neuron voltage responses to current  
801 injections. Black arrowhead illustrates a double undershoot after-hyperpolarization waveform  
802 often observed at action potential threshold-level current injection, and is characteristic of MOC  
803 neurons.

804 (B) Example of the instantaneous spike rate over time at increasing current injections from the  
805 same neuron in A. Current steps begin at 0.5 nA and increase to 3.0 nA in 0.5 nA steps.

806 (C) Mean spike rate during 500 ms current injections of increasing intensity (N = 33). Averages

Figure 2

807 for current injections up to 900 pA demonstrated a linear input-output curve. A linear function  
808 was fit to the mean data and the y-intercept was forced to 0 pA ( $slope = 0.150 \frac{Hz}{pA}$ ,  $r^2 = 0.972$ ).  
809 **(D)** Same neurons from **C**, with current injections up to 4 nA.  
810 **(E)** The ratio of spike rate adaptation during the last five spikes compared to spikes #1-5 ( $N =$   
811 11). Analysis was not performed on current steps below 200 pA for panels **E** and **F**, as no MOC  
812 neuron met the minimum requirement of fifteen action potentials at those current intensities.  
813 **(F)** The mean spike rate of spikes #5-10, and the mean spike rate of the last five spikes. All error  
814 bars are  $\pm$  SEM ( $N = 11$ ). Linear functions were fit to the average spike rate of spikes #5-10 ( $y =$   
815  $0.255x - 4.69$ ,  $r^2 = 0.999$ ), and the average spike rate of the last five spikes ( $y = 0.158x -$   
816  $9.95$ ,  $r^2 = 0.997$ ).

Figure 3

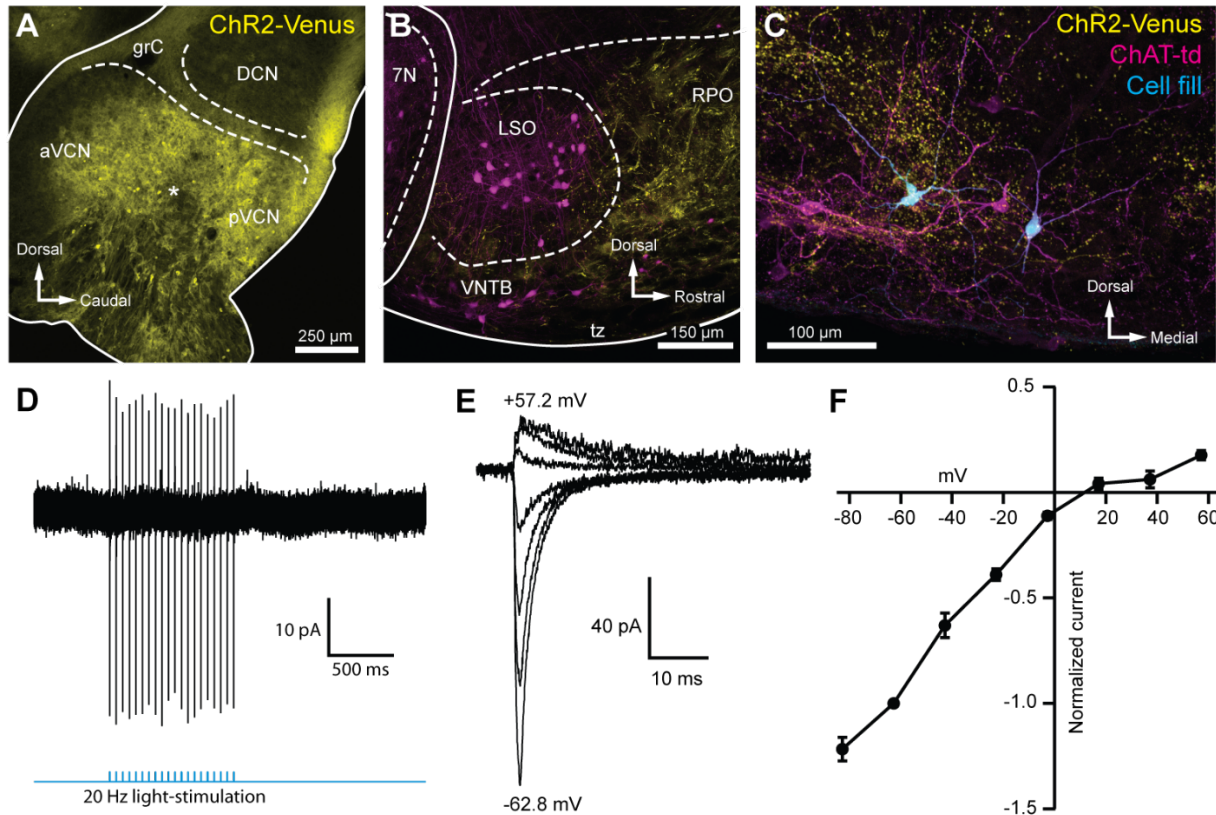

817

818 **Figure 3. Light-evoked EPSCs produced by ascending cochlear nucleus input were due to**  
819 **inwardly rectifying AMPARs.**

820 (A) Sagittal micrograph of a ChR2-Venus positive ventral cochlear nucleus (\* marks presumed  
821 injection site).

822 (B) Micrograph from the same mouse as A, where ChR2-positive fibers are present in the VNTB  
823 and RPO near MOC neuron somata.

824 (C) Two MOC neurons in the VNTB that were recorded from in a coronal brain section and  
825 filled with biocytin after post-hoc histochemistry.

826 (D) Example loose patch, cell attached recording of a ChR2-Venus positive neuron in the VCN.  
827 Neurons positive for ChR2-Venus can reliably fire action-potentials in response to light stimuli.

828 (E) An example of EPSCs evoked during voltage clamp, with holding potentials ranging from -  
829 62.8 mV to +57.2 mV in 20 mV steps. Each sweep was baselined to 0 pA and low-pass Bessel

Figure 3

830 filtered at 3000 Hz.

831 **(F)** I-V relation of normalized cumulative data ( $N = 3$  to 9 per mean). Error bars are  $\pm$  SEM.

832 Abbreviations: anteroventral cochlear nucleus (aVCN), posteroventral cochlear nucleus (pVCN),

833 dorsal cochlear nucleus (DCN), granule cell layer (grC), facial motor nucleus (7N), rostral

834 periolivary region (RPO).

Figure 3—Supplemental Figure 1

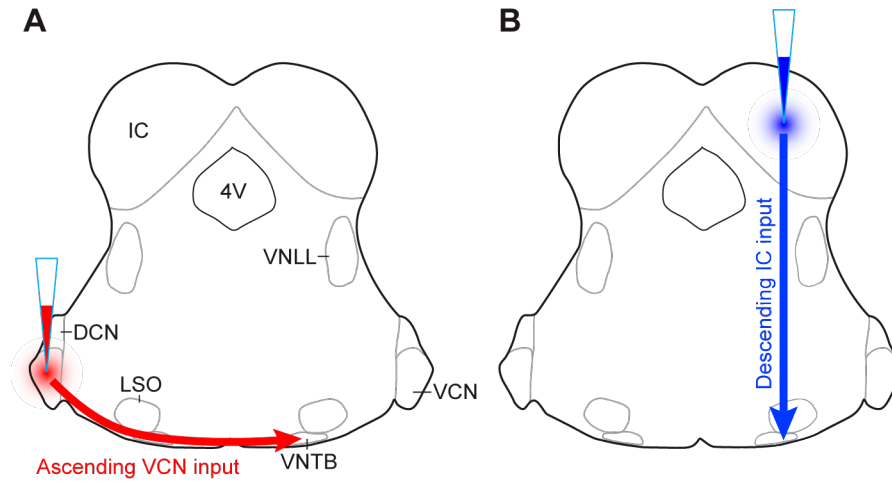

835

836

837 **Figure 3—Supplemental Figure 1: AAV injection schemes to target ascending or**

838 **descending inputs to MOC neurons.**

839 Schematics depict a unilateral injection of ChR2-Venus expressing AAV (AAV1-CAG-ChR2-

840 Venus-WPRE-SV40) into (A) VCN or (B) IC of ChAT-Cre/tdTomato mice.



Figure 4

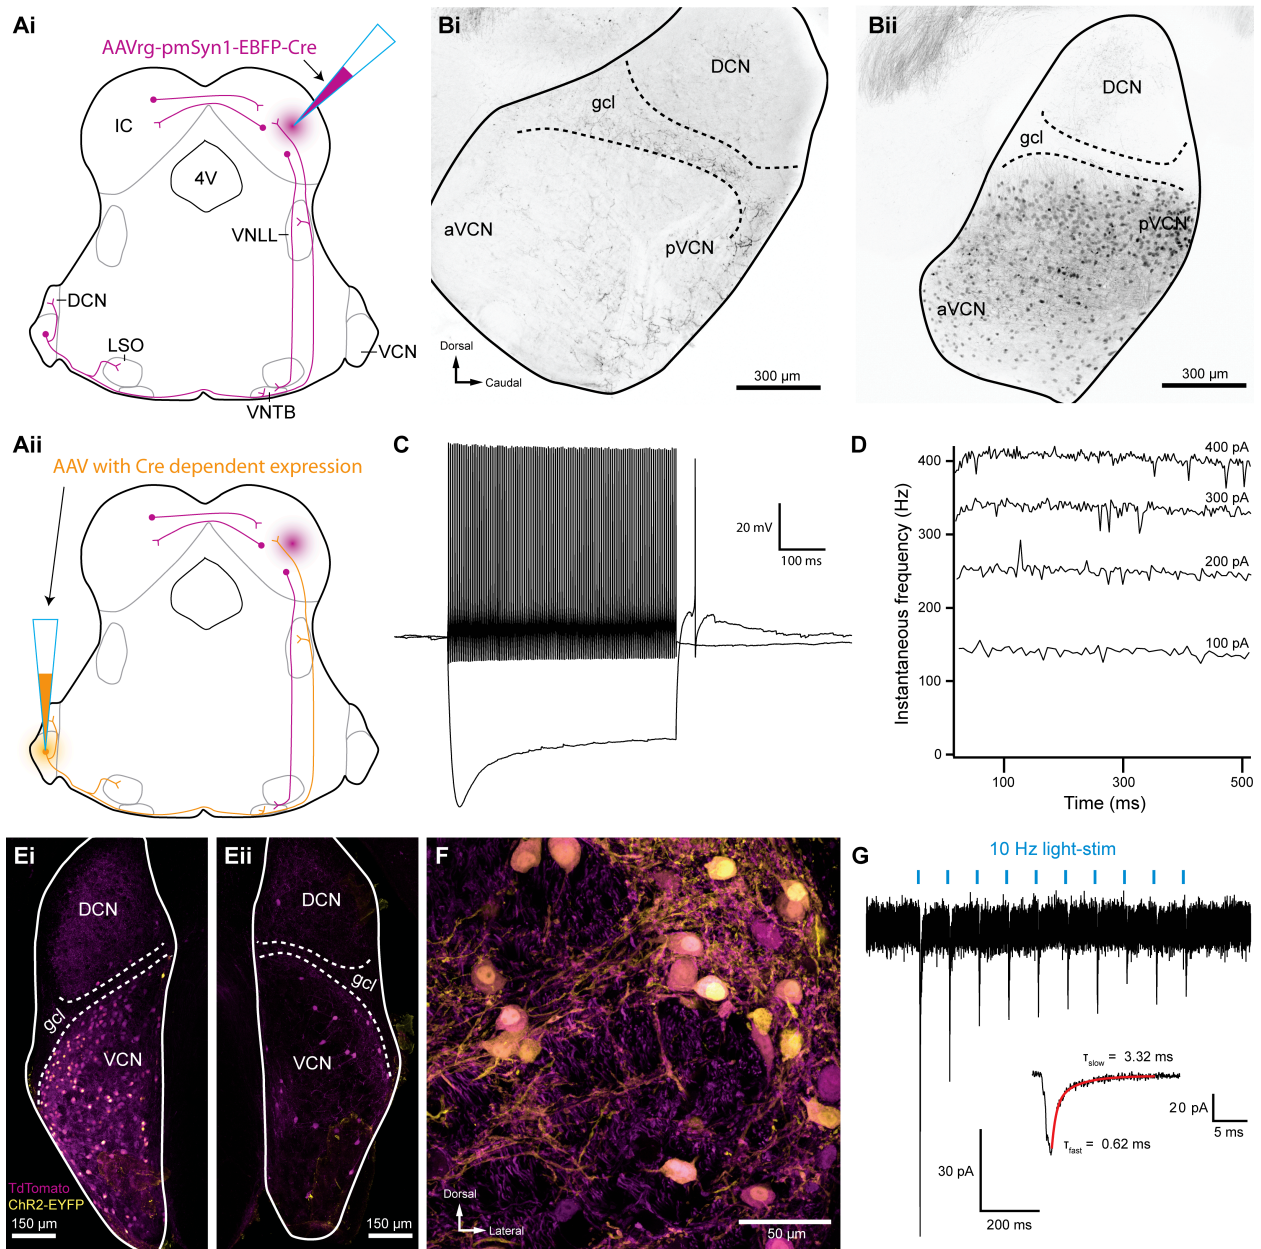

841

842 **Figure 4. Inferior colliculus projecting T-stellate neurons synapsed onto MOC neurons in**  
 843 **the ventral nucleus of the trapezoid body.**

844 (Ai) Schematic depicting an inferior colliculus injection site of Cre recombinase expressing  
 845 retrograde-AAV (AAVrg-pmSyn1-EBFP-Cre), and putative retrogradely infected neurons and  
 846 projections (magenta), including T-stellate cells and descending IC projections to olivocochlear  
 847 efferents.



Figure 4

848 **(Aii)** Continuation of **Ai**, depicting the ventral cochlear nucleus injection site for a second AAV  
849 expressing a Cre dependent channelrhodopsin. T-stellate neurons (orange) positive for both  
850 AAVs project to the ventral nucleus of the trapezoid body (VNTB), where MOC neuron somata  
851 reside.

852 **(Bi)** Sagittal micrograph of a ChAT-Cre/tdTomato cochlear nucleus. TdTomato positive fibers  
853 were visible throughout the nucleus, however, there was a complete lack of tdTomato positive  
854 somata in VCN.

855 **(Bii)** Sagittal micrograph of a ChAT-Cre/tdTomato cochlear nucleus infected with Cre  
856 expressing retrograde AAV that was injected into the contralateral to IC. TdTomato positive  
857 somata were visible throughout the VCN.

858 **(C)** Example of a current-clamp whole-cell recording from an AAVrg-pmSyn1-EBFP-  
859 Cre/tdTomato positive cell in the VCN. All recordings from tdTomato positive cells in VCN ( $N$   
860 = 13) exhibited responses to current injections characteristic of T-stellate cells. Action potentials  
861 fired tonically with a sustained rate in response to depolarizing current injections (0.2 nA).  
862 Hyperpolarizing current injections (-0.5 nA) revealed a rectifying voltage response.

863 **(D)** Example plot of instantaneous frequency of action potentials throughout the duration of  
864 depolarizing stimuli ranging from 100 to 400 pA. The spike frequency is sustained throughout  
865 the duration of the stimulus, which is characteristic of T-stellate neurons in the VCN.

866 **(Ei)** Coronal micrograph of a cochlear nucleus contralateral to Cre expressing retrograde AAV  
867 infection of IC. The VCN contralateral to IC infection was additionally infected with AAV2-  
868 EF1a-DIO-hChR2(E123T/T159C)-p2A-EYFP (UNC Vector Core), which expressed EYFP in  
869 the cytosol.

870 **(Eii)** Coronal micrograph of a cochlear nucleus ipsilateral to Cre expressing retrograde AAV

Figure 4

871 infection of IC from the same mouse as **Ei**. Many somata positive for both tdTomato and EYFP  
872 are seen in VCN contralateral to the IC infection, **Ei**, whereas no cells positive for EYFP are  
873 seen in VCN ipsilateral to the IC infection, **Eii**.

874 **(F)** A micrograph of VCN contralateral to Cre expressing retrograde AAV infection of the IC  
875 depicting tdTomato and EYFP expression from the same mouse as **Ei** & **Eii**.

876 **(G)** Whole-cell voltage clamp recording from an MOC neuron of a ChAT-Cre/tdTomato mouse  
877 contralateral to T-stellate cells expressing ChR2 via the intersectional AAV approach. Light-  
878 evoked EPSCs were stimulated with 2 ms pulses of blue light at 10 Hz, and in this example the  
879 EPSCs depressed with repetitive stimulation. This trace was created by averaging 20 sweeps of  
880 the same protocol from the same MOC neuron. Inset illustrates fast and slow decay time  
881 constants ( $\tau$ ) of the first averaged EPSC and was fit with a double exponential function (red).

882 Abbreviations: inferior colliculus (IC), fourth ventricle (4V), ventral nucleus of the lateral  
883 lemniscus (VNLL), dorsal cochlear nucleus (DCN), ventral cochlear nucleus (VCN),  
884 anteroventral cochlear nucleus (aVCN), posteroventral cochlear nucleus (pVCN), lateral superior  
885 olive (LSO), ventral nucleus of the trapezoid body (VNTB).

Figure 4—Supplemental Figure 1

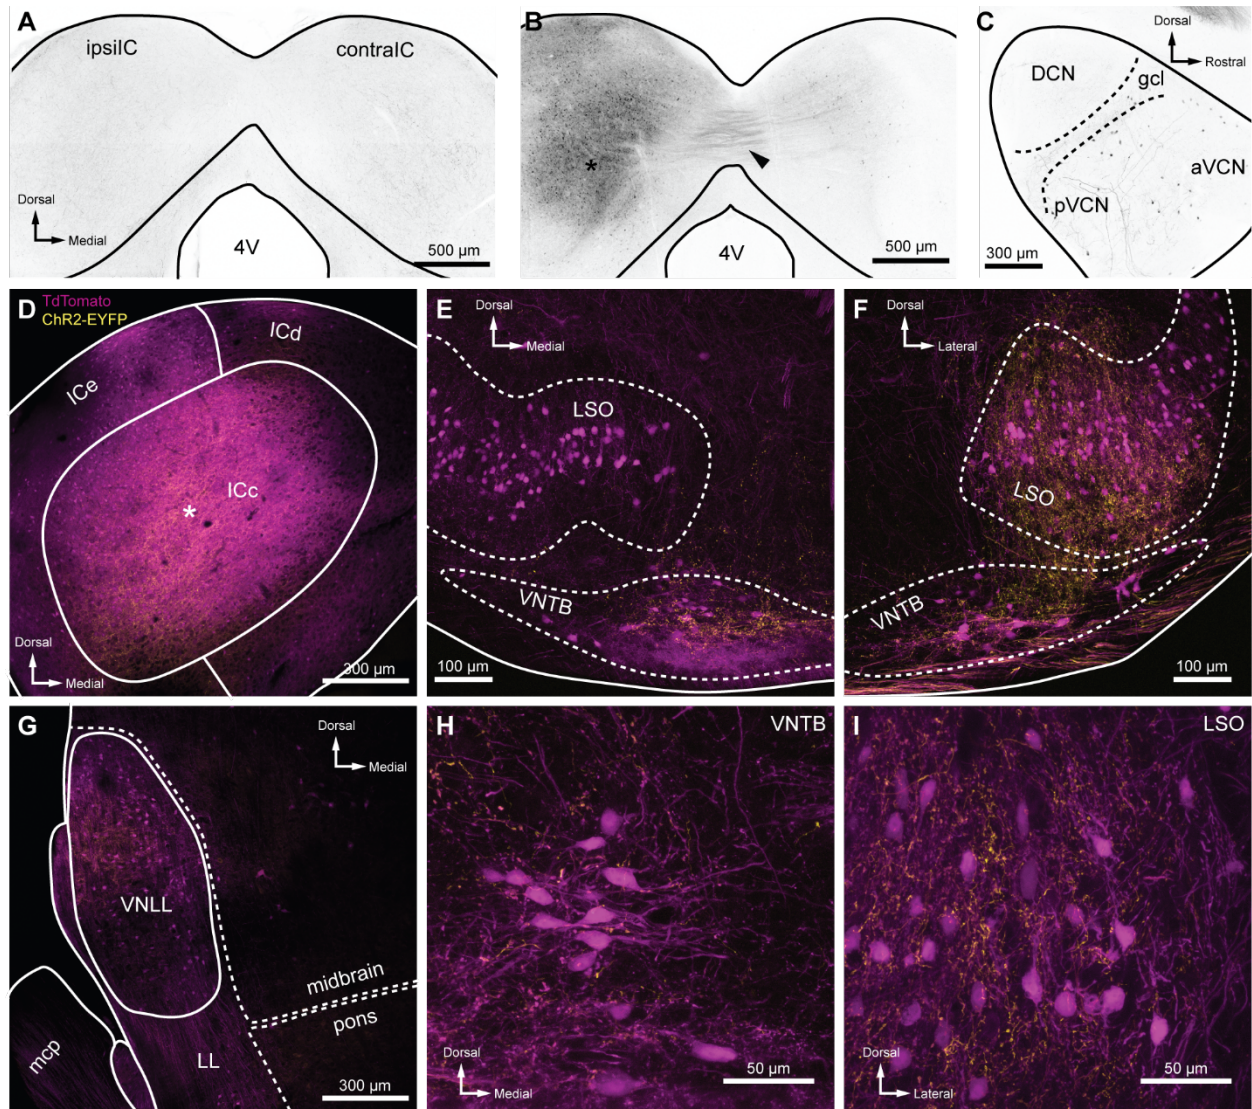

886

887 **Figure 4—Supplemental Figure 1. Intersectional AAV injection micrographs and T-stellate**  
888 **cell targets.**

889 (A) The ChAT-Cre line was crossed to an Ai9 reporter to generate mice with tdTomato in Cre  
890 positive cells (ChAT-Cre/tdTomato). This coronal micrograph of the IC showed tdTomato  
891 expression before AAV infection. TdTomato fluorescence is represented in greyscale.

892 (B) Coronal micrograph of the IC, ipsilateral (ipsilIC) and contralateral (contralIC) to the  
893 injection site of retrograde-AAV (AAVrg-pmSyn1-EBFP-Cre, asterisk), which infected local  
894 neurons, and neurons that projected to the injection site. TdTomato expressing projections in the

Figure 4—Supplemental Figure 1

895 commissure of the IC were visible (arrowhead), as were retrogradely labeled cells in IC  
896 contralateral to the infection (contraIC).

897 (C) Sagittal micrograph of cochlear nucleus ipsilateral to Cre expressing retrograde-AAV  
898 infection of ipsiIC, same mouse as B. All micrographs in D-I were from coronal sections of a  
899 ChAT-Cre/tdTomato mouse infected with AAVrg-pmSyn1-EBFP-Cre in IC, and AAV9-EF1a-  
900 DIO-hChR2(H134R)-EYFP in VCN contralateral to IC infection. EYFP is fused to ChR2,  
901 enhancing the visualization of T-stellate projections over cytosolic fluorophores.

902 (D) Coronal micrograph of IC, where ChAT-Cre/tdTomato positive neurons were seen in close  
903 proximity to an AAVrg-pmSyn1-EBFP injection site (asterisk). T-stellate originating ChR2-  
904 EYFP positive fibers projecting to the central nucleus of the inferior colliculus (ICc) were also  
905 visible (yellow).

906 (E) Micrograph of the superior olivary complex ipsilateral to the IC infection. Cholinergic  
907 neurons positive for ChAT-Cre/tdTomato delineate the lateral superior olive (LSO) and ventral  
908 nucleus of the trapezoid body (VNTB). TdTomato positive fibers originating from the IC were  
909 seen in the ventral VNTB (compare to contralateral VNTB in panel F). T-stellate fibers positive  
910 for ChR2-EYFP were prominently visible within, and dorsal to, VNTB with little to no  
911 expression in LSO.

912 (F) Micrograph of superior olivary complex contralateral to IC infection. T-stellate fibers  
913 positive for ChR2-EYFP were prominently visible within LSO and VNTB.

914 (G) Micrograph of lateral lemniscus (LL) ipsilateral to the IC infection. T-stellate fibers were  
915 visible within the ventral nucleus of the lateral lemniscus (VNLL). Cells positive for tdTomato  
916 were likely due to trans-synaptic Cre expression (Zingg et al., 2017) or ectopic ChAT-Cre  
917 expression.

Figure 4—Supplemental Figure 1

918 **(H-I)** High magnification micrographs of VNTB **(H)** and LSO **(I)** ipsilateral and contralateral to  
919 IC infection, respectively. T-stellate boutons positive for ChR2-EYFP terminated in both nuclei.



Figure 5

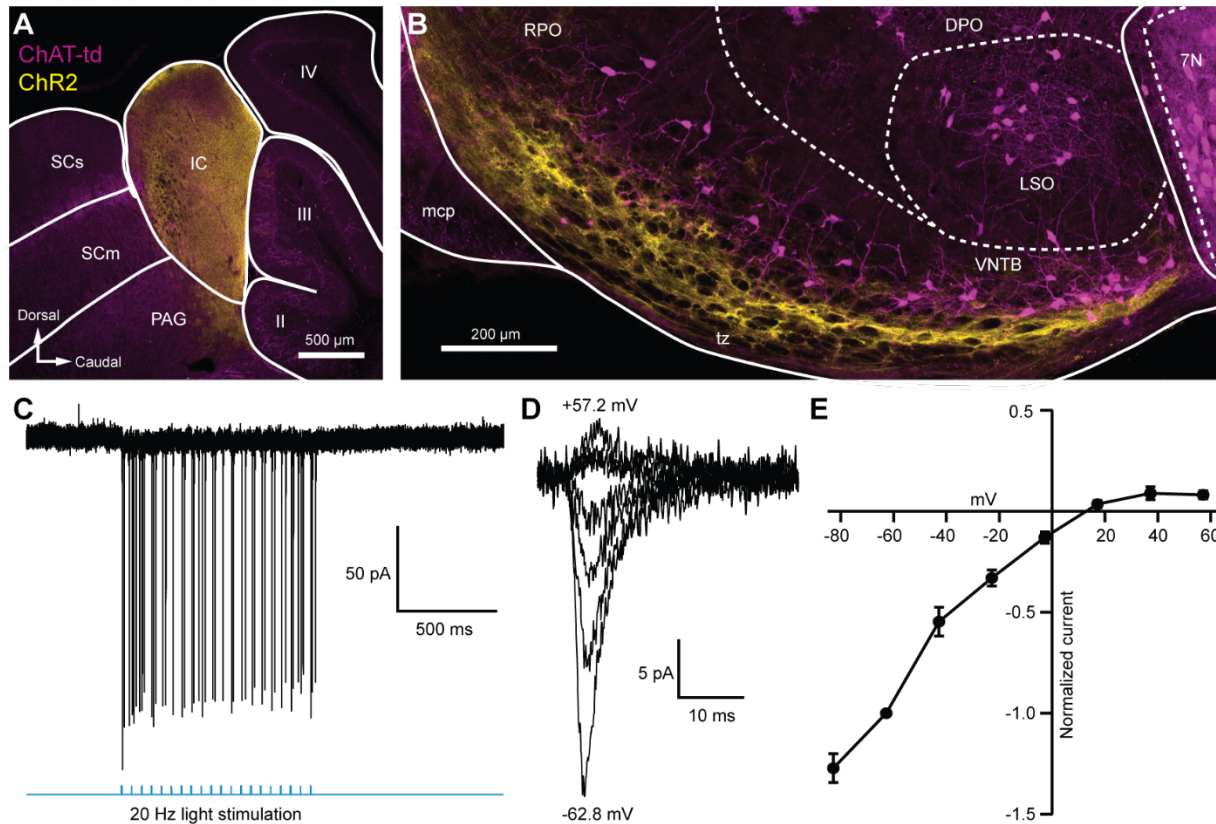

920

921 **Figure 5. Light evoked EPSCs produced by descending inferior colliculus input were due to**  
922 **inwardly rectifying AMPARs.**

923 (A) Sagittal micrograph of a ChAT-Cre/TdTomato brain section showing an IC injection site  
924 positive for ChR2-Venus.

925 (B) Sagittal micrograph of the superior olivary complex from the same mouse as in A. The  
926 majority of ChR2 positive fibers were visible in the ventral portion of the VNTB/RPO, near  
927 MOC neuron somata.

928 (C) Loose patch, cell attached recording of a ChR2-positive neuron in the IC. ChR2-Venus  
929 positive neurons can reliably fire action potentials in response to light stimuli.

930 (D) An example of EPSCs evoked during voltage clamp, with holding potentials ranging from -  
931 62.8 mV to +57.2 mV in 20 mV steps.

Figure 5

932 (E) I-V relation reporting normalized cumulative data ( $N = 4$  to  $7$  per mean,  $N = 2$  at  $+57.2$  mV).

933 Error bars are  $\pm$  SEM.

934 Abbreviations: Superior colliculus (sensory, SCs; motor, SCm), periaqueductal gray (PAG),

935 cerebellar lobules (labeled II-IV), pontine gray (PG), rostral periolivary region (RPO), dorsal

936 periolivary region (DPO), middle cerebellar peduncle (mcp), lateral superior olive (LSO), ventral

937 nucleus of the trapezoid body (VNTB), facial motor nucleus (7N).

Figure 5—Supplemental Figure 1

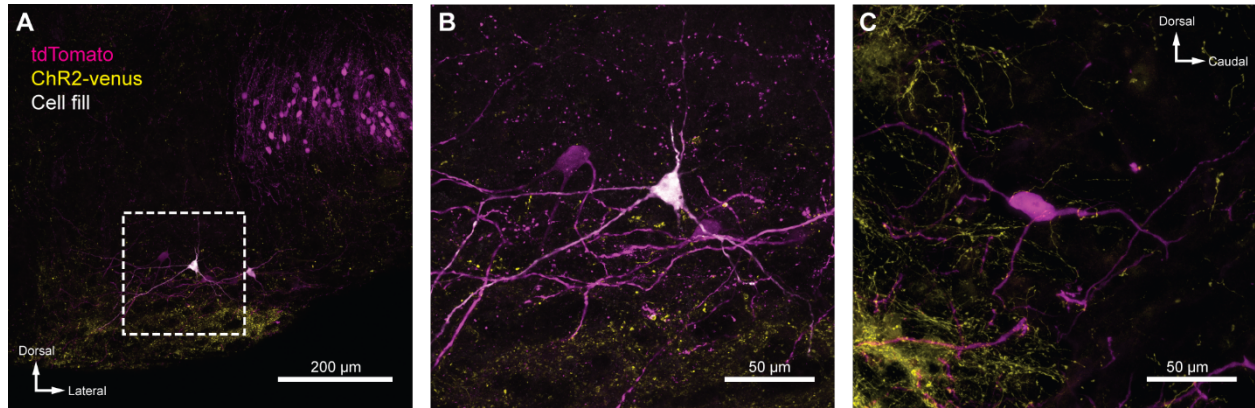

938

939 **Figure 5—Supplemental Figure 1. IC projections to MOC neurons.**

940 (A) Coronal micrograph of biocytin-filled MOC neuron in VNTB ipsilateral to ChR2-Venus  
941 infected IC.

942 (B) High magnification micrograph of MOC neuron from A.

943 (C) High magnification sagittal micrograph of a putative MOC neuron from Figure 5B. While a  
944 majority of ChR2-Venus positive fibers were ventral to MOC neurons, many positive fibers were  
945 in close apposition to MOC neuron dendrites and somata.



Figure 6

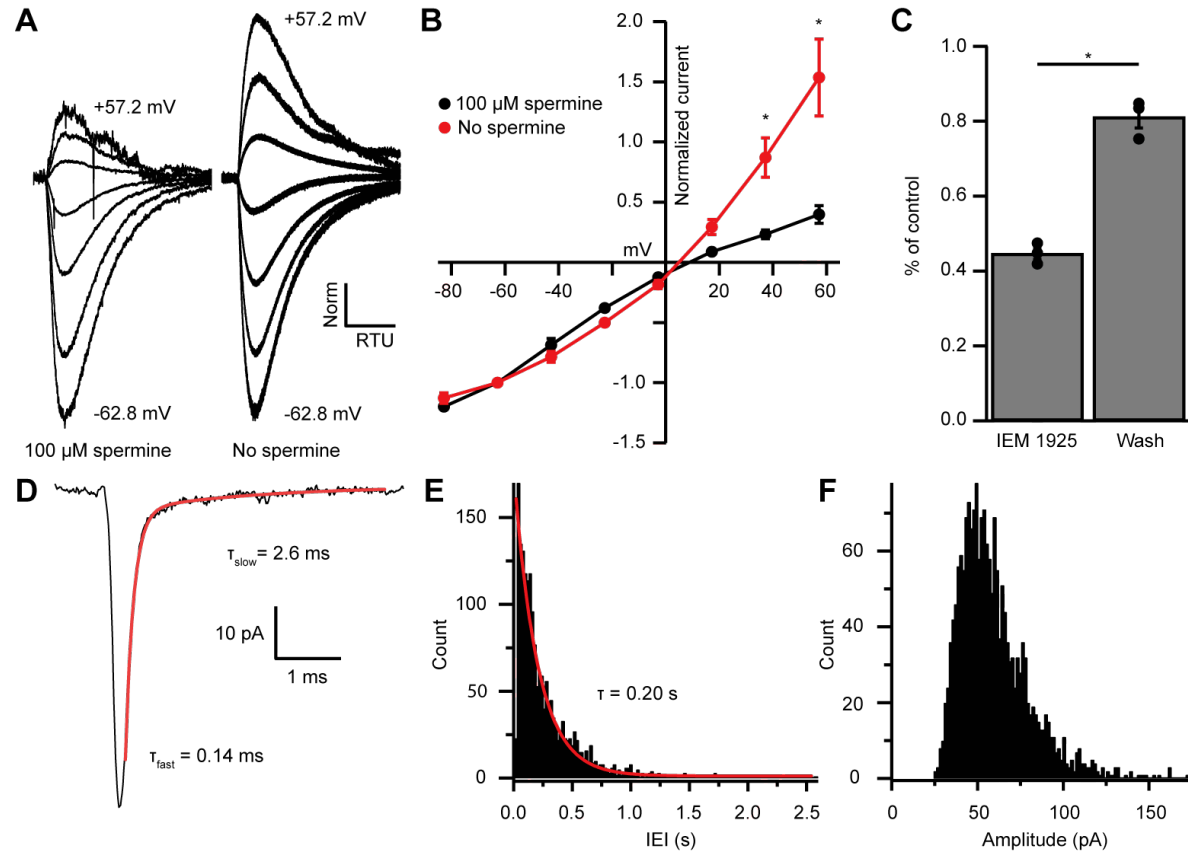

946

947 **Figure 6. EPSC inward rectification was due to endogenous polyamine block and  $\text{Ca}^{2+}$ -**  
948 **permeable AMPARs.**

949 (A) AMPAR mediated currents in MOC neurons evoked by 1 mM pressure-puffed glutamate  
950 near the cell soma. The soma of MOC neurons were dialyzed with an internal pipette solution  
951 containing 100  $\mu\text{M}$ , or no spermine. In the presence of spermine, glutamate-evoked currents  
952 resulted in an inwardly rectifying I-V relation. In the absence of spermine, the rectification was  
953 relieved though dialysis, which resulted in a linear I-V relation. Voltage steps ranged from -62.8  
954 mV to +57.2 mV in 20 mV steps. Average of 3 to 10 sweeps per trace. Each sweep was  
955 baselined to 0 pA, Bessel filtered at 3000 Hz, and normalized to glutamate-current decays and  
956 maximum amplitudes at -62.8 mV.

957 (B) An I-V curve showing the average amplitudes (normalized to -62.8 mV) of glutamate-

Figure 6

958 evoked currents in spermine-free ( $N = 3$ ) and 100  $\mu$ M spermine ( $N = 4$ ) conditions. Error bars are  
959  $\pm$  SEM. Conditions were significantly different at +37.2 and +57.2 mV ( $p = 0.019$  and  $1.2 \times 10^{-6}$ ,  
960 respectively, two-way ANOVA with *post-hoc* Tukey test).

961 (C) At -82.8 mV, AMPAR mediated currents were reduced by  $55.29 \pm 1.60$  % with bath  
962 application of  $\text{Ca}^{2+}$ -permeable AMPAR antagonist, IEM 1925 (25  $\mu$ M). Wash-out of IEM 1925  
963 resulted in inward-currents that recovered to  $81.20 \pm 2.97$  % of control.

964 (D) Average of 582 mEPSCs from one neuron. The fast component ( $\tau_{\text{fast}}$ ) was responsible for  
965 93.2 % of the decay amplitude. Fast decay kinetics are indicative of GluA2 lacking, CP-  
966 AMPARs.

967 (E) Inter-event-interval (IEI) distribution of mEPSC activity, 0.02 second bins, 1873 events from  
968 3 neurons.

969 (F) Amplitude distribution of mEPSCs, 1.5 pA bins.

Figure 7

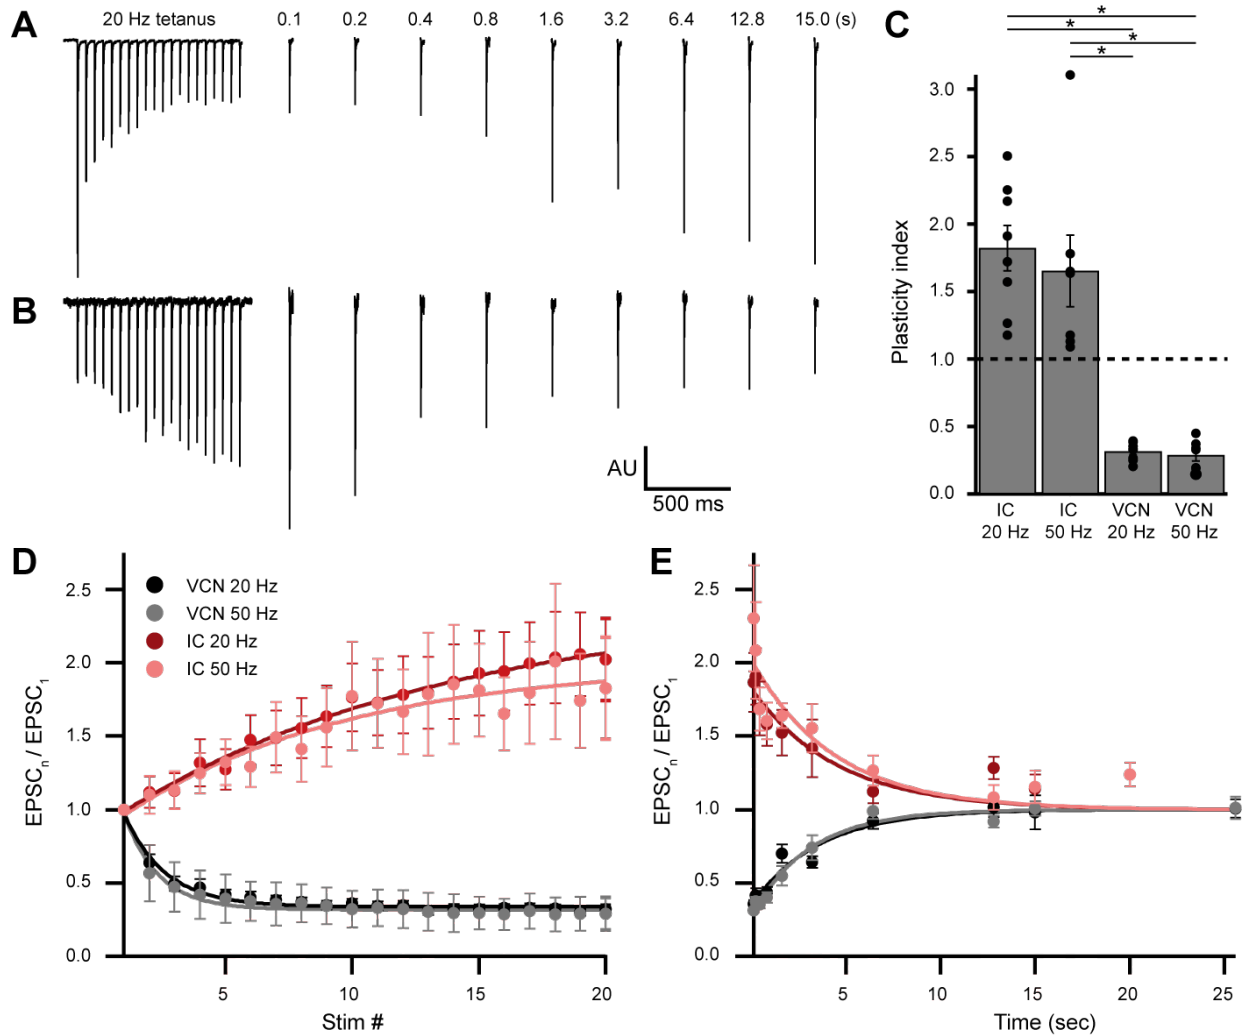

970

971 **Figure 7. Ascending and descending inputs to medial olivocochlear neurons showed distinct**  
 972 **short-term plasticity.**

973 (A-B) Light-evoked EPSCs originating from VCN (A) or IC (B) input. During a 20 Hz tetanus  
 974 stimulus, VCN-originating EPSCs depressed, whereas IC-originating EPSCs facilitated. After  
 975 each 20-pulse tetanus, a test EPSC was evoked at time intervals increasing from 100 ms to 25.6  
 976 seconds. Each average test EPSC was normalized to the first EPSC of their respective tetanus  
 977 stimulus.

978 (C) “Plasticity index” to illustrate the degree of facilitation or depression. The index for IC input  
 979 was the ratio of the amplitude of the last three EPSCs of the tetanus over the amplitude of the

Figure 7

980 first three EPSCs. The index for VCN input was the ratio of the amplitude of the last three  
981 EPSCs over the amplitude of the first EPSC of the tetanus. There was no significant difference  
982 between 20 Hz and 50 Hz stimulation between inputs of the same origin, however all IC input  
983 was significantly different to all VCN input ( $p = 4.0 \times 10^{-7}$  at 20 Hz, and  $p = 2.7 \times 10^{-4}$  at 50 Hz,  
984 two-way ANOVA with *post-hoc* Tukey test). Error bars are  $\pm$  SEM.

985 **(D)** Ascending VCN input depresses in amplitude during a tetanus stimulation at both 20 Hz and  
986 50 Hz (20 pulses) while descending IC input facilitates. The average normalized EPSC during a  
987 tetanus stimulation is shown for both VCN ( $N=7$ , 50 Hz;  $N=8$ , 20 Hz) and IC ( $N=7$ , 50 Hz;  $N=8$ ,  
988 20 Hz) input.

989 **(E)** Depression observed by ascending VCN input ( $\tau_{20 \text{ Hz}} = 3.5 \pm 0.7 \text{ sec}$ ,  $\tau_{50 \text{ Hz}} = 3.1 \pm 0.4 \text{ sec}$ )  
990 recovered with a similar time-course to IC input facilitation ( $\tau_{20 \text{ Hz}} = 4.5 \pm 1.4 \text{ sec}$ ,  $\tau_{50 \text{ Hz}} = 4.4$   
991  $\pm 1.7 \text{ sec}$ ).

Figure 7—Supplemental Figure 1

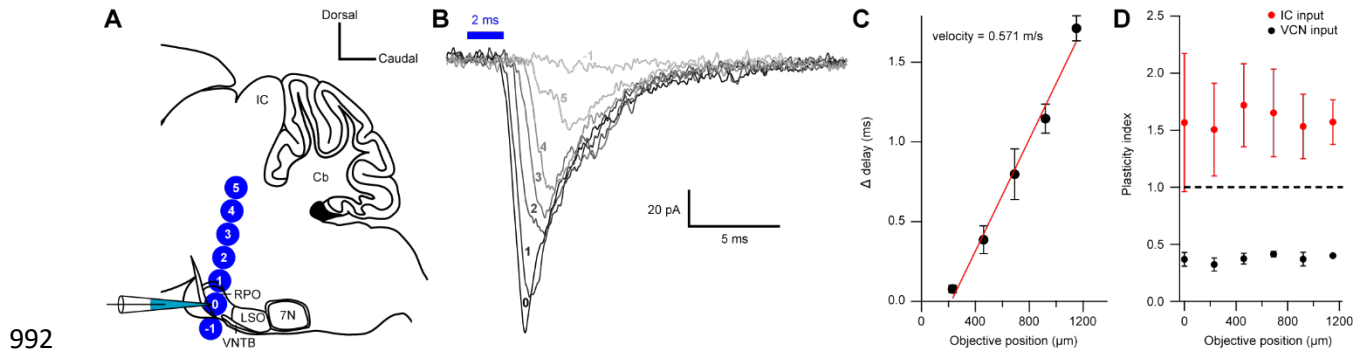

992  
993 **Figure 7—Supplemental Figure 1. Short-term plasticity from VCN and IC inputs onto**  
994 **medial olivocochlear neurons were observed with axonal and terminal level light-**  
995 **stimulation.**

996 (A) Schematic illustrating the positioning of a 40X objective lens at varying distances with  
997 respect to a recording pipette attached to an MOC neuron (not to scale). For both VCN and IC  
998 input, the objective lens was moved either toward or away from the IC in 230  $\mu$ m increments. It  
999 was assumed that axonal stimulation of IC input resulted in orthodromic activation, while axonal  
1000 stimulation of VCN input resulted in antidromic activation, as VCN originating T-stellate  
1001 neurons project to the IC, further confirming that T-stellate neurons make functional depressing  
1002 synapses onto MOC neurons.

1003 (B) Example traces of EPSCs evoked from activating IC input at varying distances from the  
1004 recording pipette. Numbers -1 through 5 correspond to the objective positions illustrated in panel  
1005 A. As the objective lens was moved further from the recording location, EPSC onset was  
1006 delayed. The EPSC amplitude often reduced, likely due to a lower probability of intact fibers at  
1007 distances further from the recording site. Each trace was an average of 20 sweeps, low-pass  
1008 Bessel filtered at 3000 Hz and baselined to 0 pA.

1009 (C) A plot showing the increase in delay from the first EPSC with increasing distance from the  
1010 recorded MOC neuron. The ‘onset’ of each EPSC was measured at -5 pA from baseline. Data

Figure 7—Supplemental Figure 1

1011 from IC and VCN were not significantly different and the data was combined ( $N = 9$  at 0 through  
1012 690  $\mu\text{m}$ ,  $N = 8$  at 920  $\mu\text{m}$  and  $N = 5$  at 1150  $\mu\text{m}$ ). Axon velocity was determined from the slope  
1013 of a linear fit of the mean data ( $y = 0.00175 * x - 0.3844, r^2 = 0.989$ ). Error bars are  $\pm$  SEM.  
1014 **(D)** Light-stimulation of VCN or IC inputs at varying distances from the recorded MOC neuron  
1015 had no effect on short-term depression or facilitation, respectively. (For IC input,  $N = 4$  at 0  
1016 through 690  $\mu\text{m}$ ,  $N = 3$  at 920 through 1150  $\mu\text{m}$ ; for VCN input,  $N = 5$  at 0 through 920  $\mu\text{m}$ ,  $N =$   
1017 2 at 1150  $\mu\text{m}$ ). Error bars are  $\pm$  SEM.

Figure 8

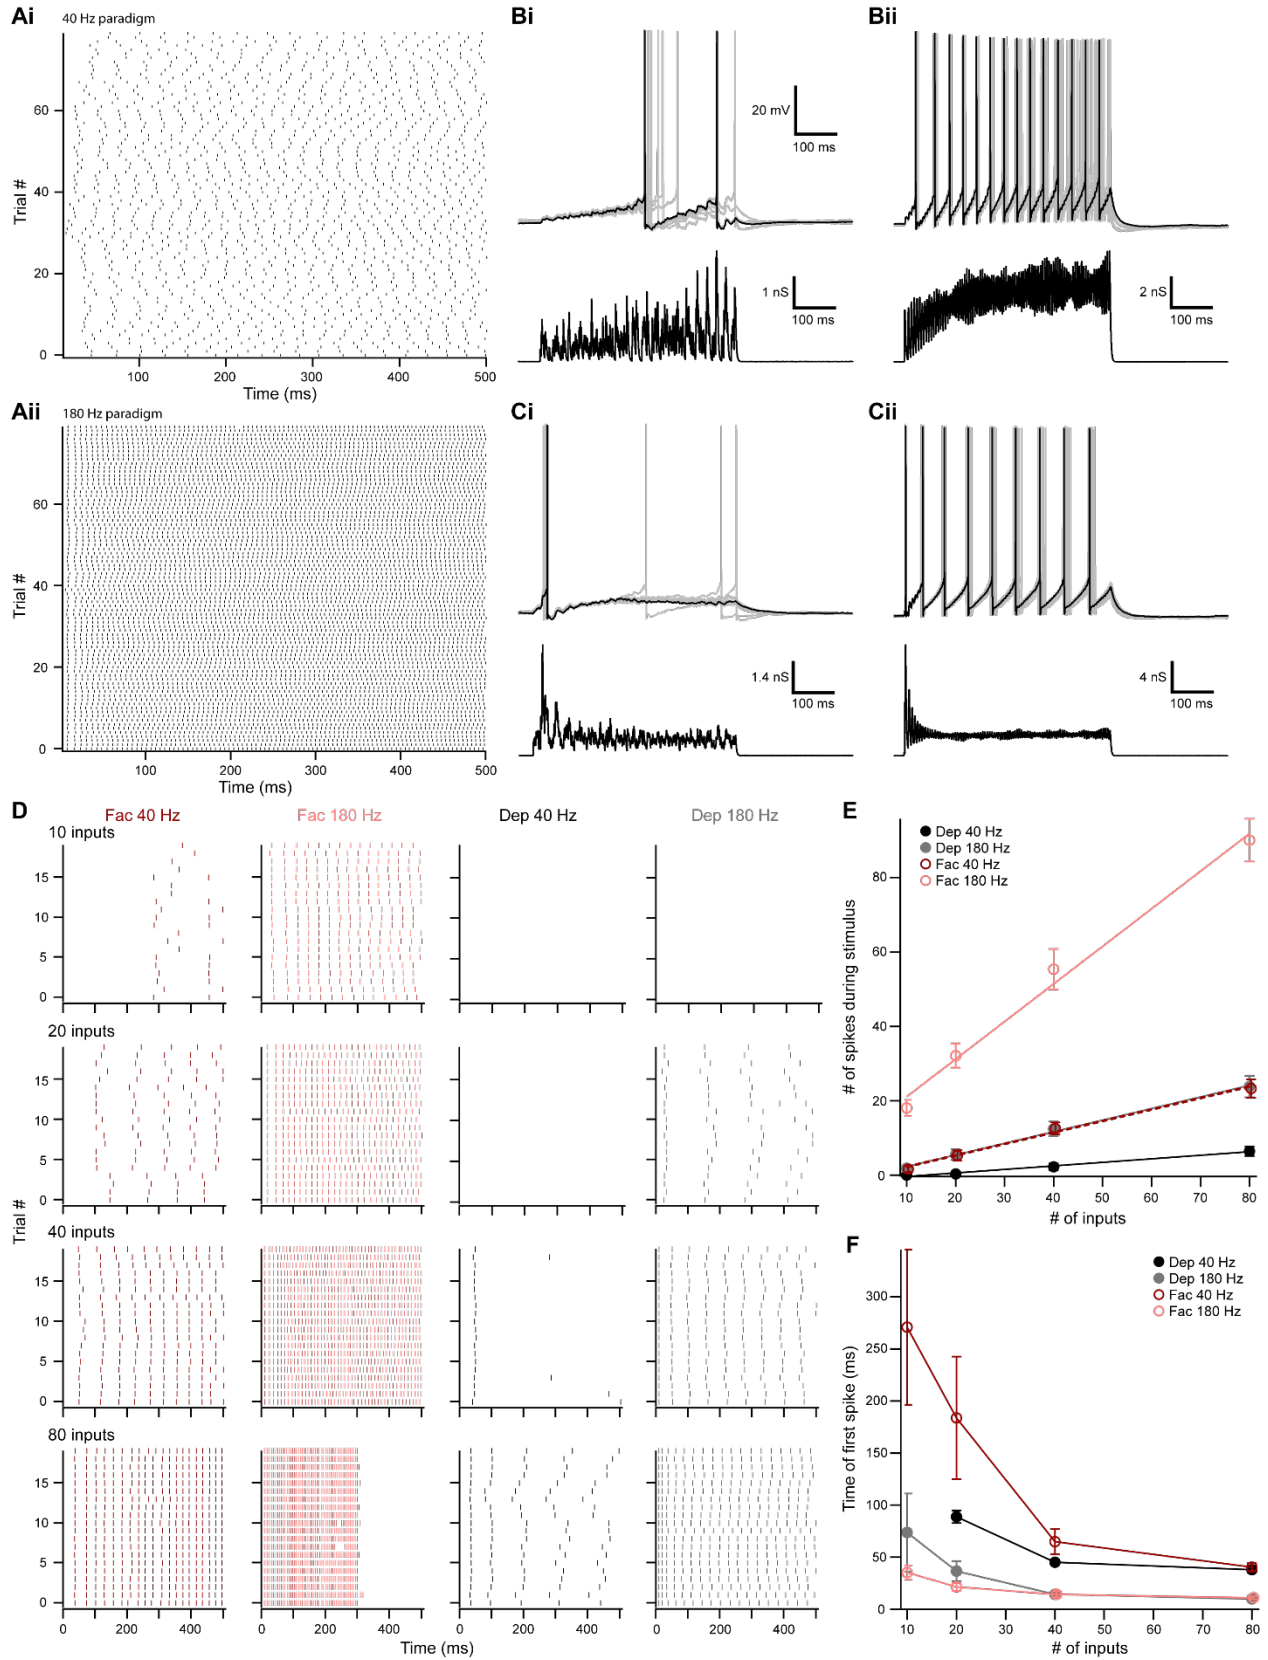

1018

Figure 8

1019 **Figure 8. The number of presynaptic inputs and type of short term plasticity control the**  
1020 **dynamic range and onset timing of MOC neuron output.**

1021 (A) Raster plots of presynaptic EPSPG onset timing. The ~40 Hz paradigm (Ai) had an average  
1022 rate of  $41.1 \pm 0.5$  Hz for all 80 trials. The ~180 Hz paradigm (Aii) had an average rate of  $176 \pm 1$   
1023 Hz for all 80 trials. Each trial was considered a presynaptic input in our model.

1024 (B) Ten examples traces of membrane voltage responses to injected conductance waveforms  
1025 simulating 10 inputs at ~40 Hz (Bi) or ~180 Hz (Bii) that underwent short term facilitation. Scale  
1026 bar is the same for all voltage responses in (B) and (C).

1027 (C) Ten examples traces of membrane voltage responses to injected conductance waveforms  
1028 simulating 40 inputs at ~40 Hz (Ci) or ~180 Hz (Cii) that underwent short term depression.

1029 (D) Example raster plots of postsynaptic MOC neuron action potential timing in response to  
1030 injected conductance waveforms. Rows of raster plots correspond to the number of simulated  
1031 inputs, and columns correspond to the type of simulated presynaptic short term plasticity and  
1032 firing rate. Blank raster plots represent an absence of firing. One example (80 presynaptic inputs  
1033 at ~180 Hz with short term facilitation) underwent depolarization block after ~300 ms. All  
1034 examples are from the same MOC neuron.

1035 (E) Average total number of action potentials evoked in MOC neurons ( $N = 6$ ) during each  
1036 conductance waveform paradigm. Error bars are  $\pm$  SEM.

1037 (F) Average timing of the peak of the first action potential evoked in MOC neurons ( $N = 6$ )  
1038 during each conductance waveform paradigm. Error bars are  $\pm$  SEM.



Figure 8—Supplemental Figure 1

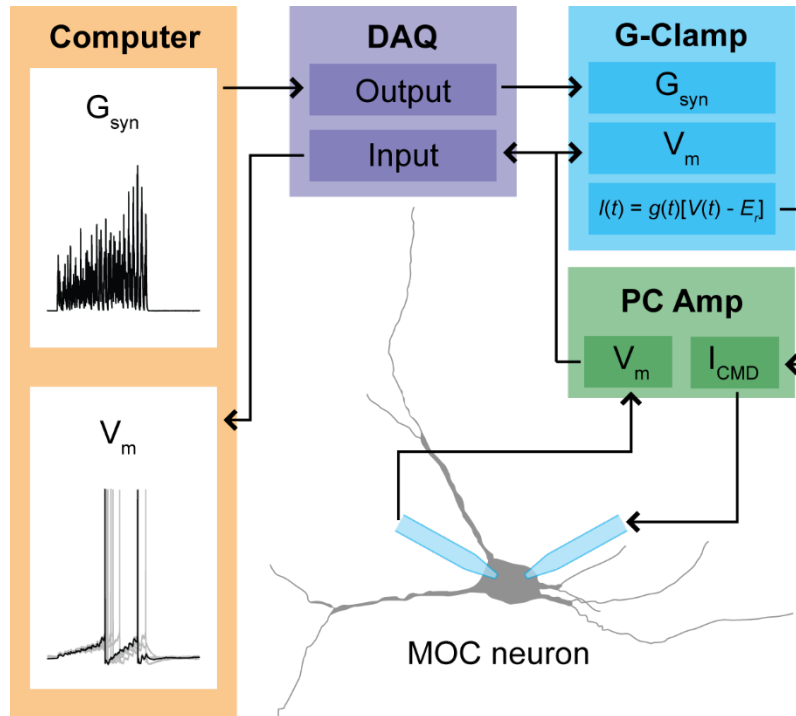

1039

1040 **Figure 8—Supplemental Figure 1. Flowchart of conductance clamp configuration.**

1041 Computer generated conductance waveforms ( $G_{syn}$ ) were sent to a data acquisition (DAQ)  
1042 instrument, which was connected to a rectifying  $G_{syn}$ -command input on an analog conductance-  
1043 clamp (G-Clamp) amplifier. MOC neurons were patched simultaneously with two patch pipettes  
1044 connected to a patch-clamp amplifier (PC Amp). One electrode served as a membrane voltage  
1045 ( $V_m$ ) follower while the other injected current. In real-time, the conductance input to the G-  
1046 Clamp amplifier instantaneously reacted to the membrane potential, producing a current,  
1047 following the equation:  $I_{CMD}(t) = G_{syn}(t)[V_m(t) - E_r]$ . The membrane potential signal was  
1048 sent to the DAQ instrument, and was digitally recorded by a computer.

Figure 9

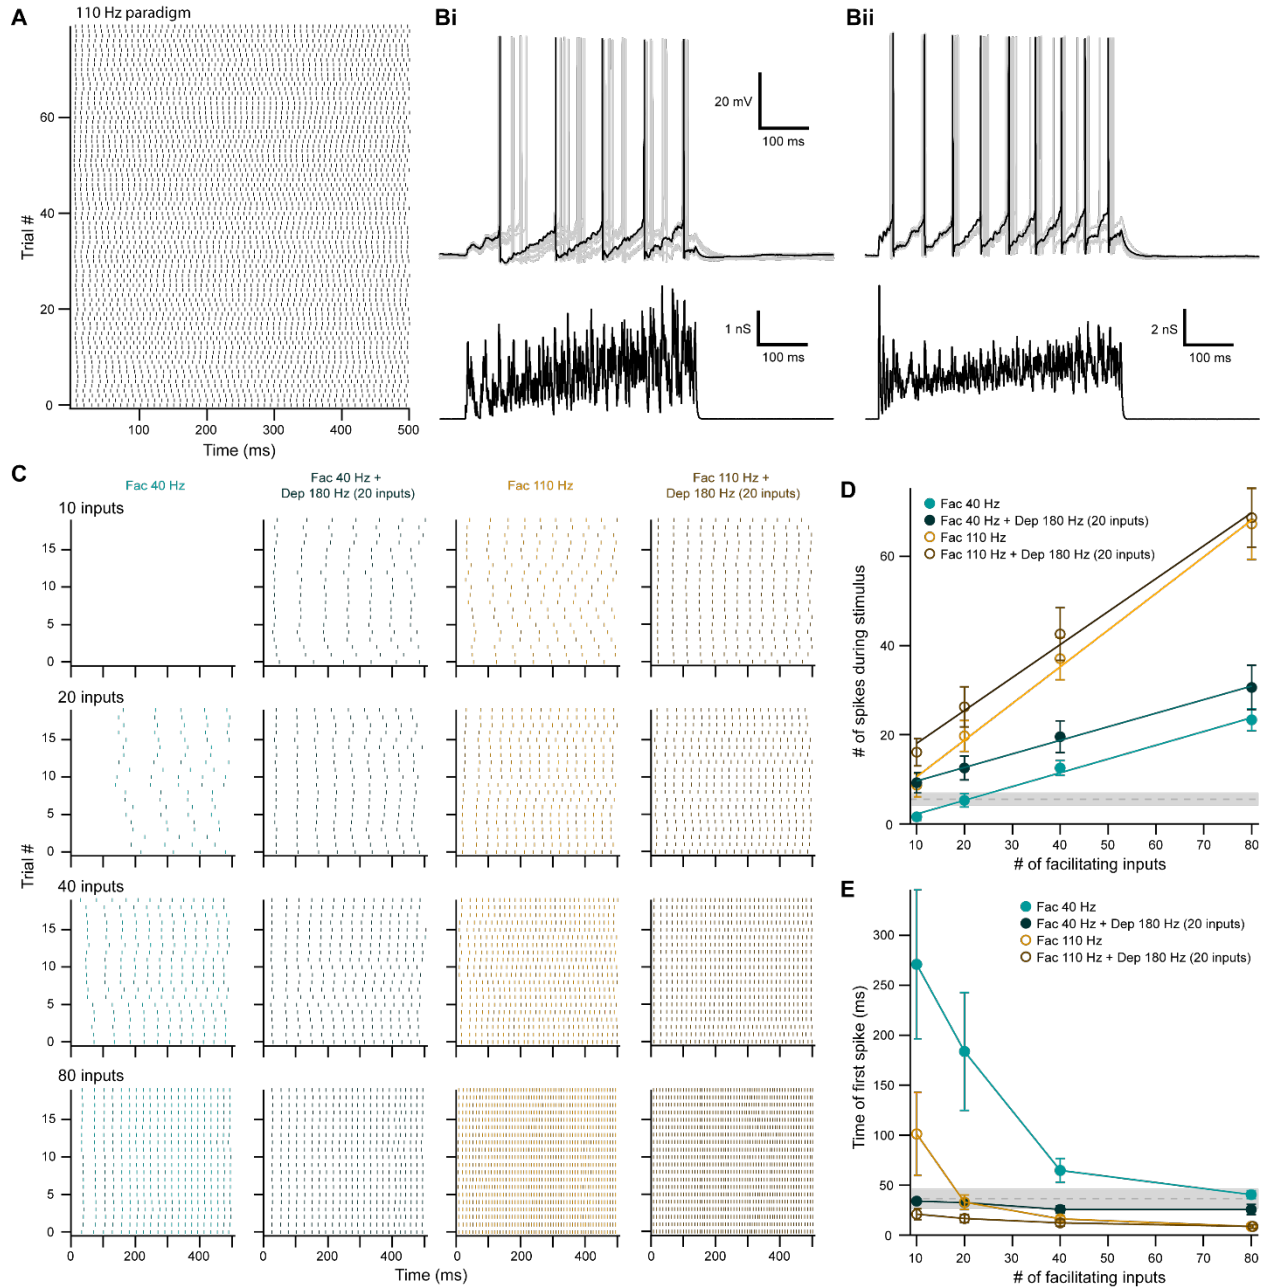

1049

1050 **Figure 9. Facilitating inputs to MOC neurons can override or be enhanced by depressing**

1051 **inputs, depending on their number and rate.**

1052 (A) Raster plot of presynaptic EPSG onset timing for the ~110 Hz paradigm which had an

1053 average rate of  $111 \pm 1$  Hz for all 80 trials. Each trial was considered a presynaptic input in our

1054 model.

Figure 9

1055 (B) Ten examples traces of membrane voltage responses to injected conductance waveforms  
1056 simulating 20 facilitating inputs at ~40 Hz without (Bi) or with (Bii) the addition of 20  
1057 depressing inputs at ~180 Hz. Scale bar is the same for both voltage responses.

1058 (C) Example raster plots of postsynaptic MOC neuron action potential timing in response to  
1059 injected conductance waveforms, without (even columns) or with (odd columns) the addition of  
1060 20 depressing inputs at ~180 Hz. Rows of raster plots correspond to the number of simulated  
1061 inputs, and columns correspond to the type of simulated presynaptic short term plasticity and  
1062 firing rate. Blank raster plots represent an absence of firing. All examples are from the same  
1063 MOC neuron.

1064 (D) Average total number of action potentials evoked in MOC neurons ( $N = 5$ ) during each  
1065 conductance waveform paradigm. Error bars are  $\pm$  SEM. Grey dashed line represents 20  
1066 depressing inputs at ~180 Hz, and the shaded area represents  $\pm$  SEM in (D) and (F).

1067 (F) Average timing of the peak of the first action potential evoked in MOC neurons ( $N = 5$ )  
1068 during each conductance waveform paradigm. Error bars are  $\pm$  SEM.

1069 **Citations:**

- 1070 Adams JC (1979) Ascending projections to the inferior colliculus. *J Comp Neurol* 183:519–538.
- 1071 Bowie D, Mayer ML (1995) Inward rectification of both AMPA and kainate subtype glutamate receptors  
1072 generated by polyamine-mediated ion channel block. *Neuron* 15:453–462.
- 1073 Brown MC (1989) Morphology and response properties of single olivocochlear fibers in the guinea pig.  
1074 *Hear Res* 40:93–109.
- 1075 Brown MC (2016) Recording and labeling at a site along the cochlea shows alignment of medial  
1076 olivocochlear and auditory nerve tonotopic mappings. *J Neurophysiol* 115:1644–1653.
- 1077 Brown MC, Levine JL (2008) Dendrites of medial olivocochlear neurons in mouse. *Neuroscience*  
1078 154:147–159.
- 1079 Brown MC, Mukerji S, Drottar M, Windsor AM, Lee DJ (2013) Identification of inputs to olivocochlear  
1080 neurons using transneuronal labeling with pseudorabies virus (PRV). *JARO - J Assoc Res*  
1081 *Otolaryngol* 14:703–717.
- 1082 Caicedo A, Herbert H (1993) Topography of descending projections from the inferior colliculus to  
1083 auditory brainstem nuclei in the rat. *J Comp Neurol* 328:377–392.
- 1084 Cant NB, Oliver DL (2018) Overview of Auditory Projection Pathways and Intrinsic Microcircuits. In: *The*  
1085 *Mammalian Auditory Pathways* (Oliver DL, Cant NB, Fay RR, Popper AN, eds), pp 7–39 Springer  
1086 *Handbook of Auditory Research*. Cham: Springer International Publishing.
- 1087 Clements JD, Bekkers JM (1997) Detection of spontaneous synaptic events with an optimally scaled  
1088 template. *Biophys J* 73:220–229.
- 1089 Cody AR, Johnstone BM (1982) Acoustically evoked activity of single efferent neurons in the guinea pig  
1090 cochlea. *J Acoust Soc Am* 72:280–282.
- 1091 Darrow KN, Benson TE, Brown MC (2012) Planar multipolar cells in the cochlear nucleus project to  
1092 medial olivocochlear neurons in mouse. *J Comp Neurol* 520:1365–1375.
- 1093 Darrow KN, Maison SF, Liberman MC (2007) Selective removal of lateral olivocochlear efferents  
1094 increases vulnerability to acute acoustic injury. *J Neurophysiol* 97:1775–1785.
- 1095 De Venecia RK, Liberman MC, Guinan JJ, Brown MC, Ronald K, Al VET, De Venecia RK, Liberman MC,  
1096 Guinan JJ, Brown MC (2005) Medial olivocochlear reflex interneurons are located in the  
1097 posteroventral cochlear nucleus: A kainic acid lesion study in guinea pigs. *J Comp Neurol*  
1098 487:345–360.
- 1099 Delano PH, Elgueda D, Hamame CM, Robles L (2007) Selective Attention to Visual Stimuli Reduces  
1100 Cochlear Sensitivity in Chinchillas. *J Neurosci* 27:4146–4153.

- 1101 Donevan SD, Rogawski MA (1995) Intracellular polyamines mediate inward rectification of Ca(2+)-  
1102 permeable alpha-amino-3-hydroxy-5-methyl-4-isoxazolepropionic acid receptors. *Proc Natl Acad*  
1103 *Sci* 92:9298–9302.
- 1104 Ehret G, Moffat AJM (1985) Inferior colliculus of the house mouse. *J Comp Physiol A* 156:619–635.
- 1105 Farhadi A, Jennings SG, Strickland EA, Carney LH (2021) A closed-loop gain-control feedback model for  
1106 the medial efferent system of the descending auditory pathway. *IEEE*, in press.
- 1107 Fatt P, Katz B (1952) Spontaneous subthreshold activity at motor nerve endings. *J Physiol* 117:109–128.
- 1108 Faye-Lund H (1986) Projection from the inferior colliculus to the superior olivary complex in the albino  
1109 rat. *Anat Embryol (Berl)* 175:35–52.
- 1110 Ferragamo MJ, Golding NL, Oertel D (1998) Synaptic Inputs to Stellate Cells in the Ventral Cochlear  
1111 Nucleus. *J Neurophysiol* 79:51–63.
- 1112 Fex J (1962) Auditory activity in centrifugal and centripetal cochlear fibres in cat. A study of a feedback  
1113 system. *Acta Physiol Scand Suppl* 189:1–68.
- 1114 Fujino K, Koyano K, Ohmori H (1997) Lateral and Medial Olivocochlear Neurons Have Distinct  
1115 Electrophysiological Properties in the Rat Brain Slice. *J Neurophysiol* 77:2788–2804.
- 1116 Gardner SM, Trussell LO, Oertel D (1999) Time Course and Permeation of Synaptic AMPA Receptors in  
1117 Cochlear Nuclear Neurons Correlate with Input. *J Neurosci* 19:8721–8729.
- 1118 Gardner SM, Trussell LO, Oertel D (2001) Correlation of AMPA Receptor Subunit Composition with  
1119 Synaptic Input in the Mammalian Cochlear Nuclei. *J Neurosci* 21:7428–7437.
- 1120 Geiger JRP, Melcher T, Koh D-S, Sakmann B, Seeburg PH, Jonas P, Monyer H (1995) Relative abundance  
1121 of subunit mRNAs determines gating and Ca<sup>2+</sup> permeability of AMPA receptors in principal  
1122 neurons and interneurons in rat CNS. *Neuron* 15:193–204.
- 1123 Golding NL, Ferragamo MJ, Oertel D (1999) Role of Intrinsic Conductances Underlying Responses to  
1124 Transients in Octopus Cells of the Cochlear Nucleus. *J Neurosci* 19:2897–2905.
- 1125 Guinan JJ (2010) Cochlear efferent innervation and function. *Curr Opin Otolaryngol Head Neck Surg*  
1126 18:447–453.
- 1127 Guinan JJ (2018) Olivocochlear efferents: Their action, effects, measurement and uses, and the impact of  
1128 the new conception of cochlear mechanical responses. *Hear Res* 362:38–47.
- 1129 Guinan JJ, Warr WB, Norris BE (1983) Differential olivocochlear projections from lateral versus medial  
1130 zones of the superior olivary complex. *J Comp Neurol* 221:358–370.
- 1131 Guinan JJ, Warr WB, Norris BE (1984) Topographic organization of the olivocochlear projections from the  
1132 lateral and medial zones of the superior olivary complex. *J Comp Neurol* 226:21–27.

- 1133 Hansel C, Linden DJ (2000) Long-Term Depression of the Cerebellar Climbing Fiber–Purkinje Neuron  
1134 Synapse. *Neuron* 26:473–482.
- 1135 Horvath M, Ribari O, Gabor R, Toth IE, Boldogkoi Z, Palkovits M (2003) Intracochlear injection of  
1136 pseudorabies virus labels descending auditory and monoaminergic projections to olivocochlear  
1137 cells in guinea pig. *Eur J Neurosci* 18:1439–1447.
- 1138 Jackman SL, Beneduce BM, Drew IR, Regehr WG (2014) Achieving High-Frequency Optical Control of  
1139 Synaptic Transmission. *J Neurosci* 34:7704–7714.
- 1140 Kawase T, Liberman MC (1993) Antimasking effects of the olivocochlear reflex. I. Enhancement of  
1141 compound action potentials to masked tones. *J Neurophysiol* 70:2519–2532.
- 1142 Koike-Tani M, Saitoh N, Takahashi T (2005) Mechanisms underlying developmental speeding in AMPA-  
1143 EPSC decay time at the calyx of Held. *J Neurosci* 25:199–207.
- 1144 Kujawa SG, Liberman MC (1997) Conditioning-Related Protection From Acoustic Injury: Effects of  
1145 Chronic Deafferentation and Sham Surgery. *J Neurophysiol* 78:3095–3106.
- 1146 Kuwada S, Batra R, Yin TCT, Oliver DL, Haberly LB, Stanford TR (1997) Intracellular Recordings in  
1147 Response to Monaural and Binaural Stimulation of Neurons in the Inferior Colliculus of the Cat. *J*  
1148 *Neurosci* 17:7565–7581.
- 1149 Liberman MC (1980) Efferent synapses in the inner hair cell area of the cat cochlea: an electron  
1150 microscopic study of serial sections. *Hear Res* 3:189–204.
- 1151 Liberman MC (1988) Response properties of cochlear efferent neurons: monaural vs. binaural  
1152 stimulation and the effects of noise. *J Neurophysiol* 60:1779–1798.
- 1153 Liberman MC, Brown MC (1986) Physiology and anatomy of single olivocochlear neurons in the cat. *Hear*  
1154 *Res* 24:17–36.
- 1155 Lilaonitkul W, Guinan JJ (2009) Human Medial Olivocochlear Reflex: Effects as Functions of Contralateral,  
1156 Ipsilateral, and Bilateral Elicitor Bandwidths. *JARO J Assoc Res Otolaryngol* 10:459–470.
- 1157 Lujan B, Dagostin A, von Gersdorff H (2019) Presynaptic Diversity Revealed by Ca<sup>2+</sup>-Permeable AMPA  
1158 Receptors at the Calyx of Held Synapse. *J Neurosci* 39:2981–2994.
- 1159 Magleby KL (1987) Short-term changes in synaptic efficacy. In: *Synaptic function* (Edelman GM, Gall WE,  
1160 Cowan WM, eds). N Y Wiley:21–56.
- 1161 Magleby KL, Zengel JE (1976) Augmentation: A process that acts to increase transmitter release at the  
1162 frog neuromuscular junction. *J Physiol* 257:449–470.
- 1163 Mosbacher J, Schoepfer R, Monyer H, Burnashev N, Seeburg PH, Ruppertsberg JP (1994) A molecular  
1164 determinant for submillisecond desensitization in glutamate receptors. *Science* 266:1059–1062.
- 1165 Mulders WHAM, Robertson D (2000) Morphological relationships of peptidergic and noradrenergic  
1166 nerve terminals to olivocochlear neurones in the rat. *Hear Res* 144:53–64.

- 1167 Mulders WHAM, Robertson D (2001) Origin of the noradrenergic innervation of the superior olivary  
1168 complex in the rat. *J Chem Neuroanat* 21:313–322.
- 1169 Mulders WHAM, Robertson D (2002) Inputs from the cochlea and the inferior colliculus converge on  
1170 olivocochlear neurones. *Hear Res* 167:206–213.
- 1171 Oertel D, Wright S, Cao XJ, Ferragamo M, Bal R (2011) The multiple functions of T  
1172 stellate/multipolar/chopper cells in the ventral cochlear nucleus. *Hear Res* 276:61–69.
- 1173 Ono M, Bishop DC, Oliver DL (2017) Identified GABAergic and Glutamatergic Neurons in the Mouse  
1174 Inferior Colliculus Share Similar Response Properties. *J Neurosci* 37:8952–8964.
- 1175 Otsuka S, Nakagawa S, Furukawa S (2018) A preceding sound expedites medial olivocochlear reflex. *Acta*  
1176 *Acust United Acust* 104:804–808.
- 1177 Petreanu L, Mao T, Sternson SM, Svoboda K (2009) The subcellular organization of neocortical excitatory  
1178 connections. *Nature* 457:1142–1145.
- 1179 Rajan R (1988) Effect of electrical stimulation of the crossed olivocochlear bundle on temporary  
1180 threshold shifts in auditory sensitivity. II. Dependence on the level of temporary threshold shifts.  
1181 *J Neurophysiol* 60:569–579.
- 1182 Rhode WS, Smith PH (1986) Encoding timing and intensity in the ventral cochlear nucleus of the cat. *J*  
1183 *Neurophysiol* 56:261–286.
- 1184 Robertson D (1984) Horseradish peroxidase injection of physiologically characterized afferent and  
1185 efferent neurones in the guinea pig spiral ganglion. *Hear Res* 15:113–121.
- 1186 Robertson D, Gummer M (1985) Physiological and morphological characterization of efferent neurones  
1187 in the guinea pig cochlea. *Hear Res* 20:63–77.
- 1188 Rossi J, Balthasar N, Olson D, Scott M, Berglund E, Lee CE, Choi MJ, Lauzon D, Lowell BB, Elmquist JK  
1189 (2011) Melanocortin-4 receptors expressed by cholinergic neurons regulate energy balance and  
1190 glucose homeostasis. *Cell Metab* 13:195–204.
- 1191 Rothman JS, Silver RA (2018) NeuroMatic: An Integrated Open-Source Software Toolkit for Acquisition,  
1192 Analysis and Simulation of Electrophysiological Data. *Front Neuroinformatics* 12:14.
- 1193 Saint Marie RL (1996) Glutamatergic connections of the auditory midbrain: Selective uptake and axonal  
1194 transport of D-[3H]aspartate. *J Comp Neurol* 373:255–270.
- 1195 Sakurai M (1987) Synaptic modification of parallel fibre-Purkinje cell transmission in in vitro guinea-pig  
1196 cerebellar slices. *J Physiol* 394:463–480.
- 1197 Schindelin J, Arganda-Carreras I, Frise E, Kaynig V, Longair M, Pietzsch T, Preibisch S, Rueden C, Saalfeld  
1198 S, Schmid B, Tinevez JY, White DJ, Hartenstein V, Eliceiri K, Tomancak P, Cardona A (2012) Fiji: An  
1199 open-source platform for biological-image analysis. *Nat Methods* 9:676–682.



- 1200 Smith PH, Joris PX, Carney LH, Yin TC (1991) Projections of physiologically characterized globular bushy  
1201 cell axons from the cochlear nucleus of the cat. *J Comp Neurol* 304:387–407.
- 1202 Smith PH, Rhode WS (1989) Structural and functional properties distinguish two types of multipolar cells  
1203 in the ventral cochlear nucleus. *J Comp Neurol* 282:595–616.
- 1204 Suthakar K, Ryugo DK (2017) Descending projections from the inferior colliculus to medial olivocochlear  
1205 efferents: Mice with normal hearing, early onset hearing loss, and congenital deafness. *Hear Res*  
1206 343:34–49.
- 1207 Suzuki J, Hashimoto K, Xiao R, Vandenberghe LH, Liberman MC (2017) Cochlear gene therapy with  
1208 ancestral AAV in adult mice: complete transduction of inner hair cells without cochlear  
1209 dysfunction. *Sci Rep* 7:45524.
- 1210 Terreros G, Delano PH (2015) Corticofugal modulation of peripheral auditory responses. *Front Syst*  
1211 *Neurosci* 9:134.
- 1212 Tervo DGR, Hwang B-Y, Viswanathan S, Gaj T, Lavzin M, Ritola KD, Lindo S, Michael S, Kuleshova E, Ojala  
1213 D, Huang C-C, Gerfen CR, Schiller J, Dudman JT, Hantman AW, Looger LL, Schaffer DV, Karpova  
1214 AY (2016) A Designer AAV Variant Permits Efficient Retrograde Access to Projection Neurons.  
1215 *Neuron* 92:372–382.
- 1216 Thompson AM (1998) Heterogeneous projections of the cat posteroventral cochlear nucleus. *J Comp*  
1217 *Neurol* 390:439–453.
- 1218 Thompson AM, Schofield B (2000) Afferent Projections of the Superior Olivary Complex. *Microsc Res*  
1219 *Tech* 51:355–363.
- 1220 Thompson AM, Thompson GC (1991) Posteroventral cochlear nucleus projections to olivocochlear  
1221 neurons. *J Comp Neurol* 303:267–285.
- 1222 Thompson AM, Thompson GC (1993) Relationship of descending inferior colliculus projections to  
1223 olivocochlear neurons. *J Comp Neurol* 335:402–412.
- 1224 Thompson AM, Thompson GC (1995) Light microscopic evidence of serotonergic projections to  
1225 olivocochlear neurons in the bush baby (*Otolemur garnettii*). *Brain Res* 695:263–266.
- 1226 Torres Cadenas L, Fischl MJ, Weisz CJC (2019) Synaptic inhibition of medial olivocochlear efferent  
1227 neurons by neurons of the medial nucleus of the trapezoid body. *J Neurosci*:1288–19.
- 1228 Twomey EC, Yelshanskaya MV, Vassilevski AA, Sobolevsky AI (2018) Mechanisms of Channel Block in  
1229 Calcium-Permeable AMPA Receptors. *Neuron* 99:956-968.e4.
- 1230 Vetter DE, Saldaña E, Mugnaini E (1993) Input from the inferior colliculus to medial olivocochlear  
1231 neurons in the rat: A double label study with PHA-L and cholera toxin. *Hear Res* 70:173–186.
- 1232 Wang X, Robertson D (1997) Two Types of Actions of Norepinephrine on Identified Auditory Efferent  
1233 Neurons in Rat Brain Stem Slices. *J Neurophysiol* 78:1800–1810.



- 1234 Wang X, Robertson D (1998) Substance P-Induced Inward Current in Identified Auditory Efferent  
1235 Neurons in Rat Brain Stem Slices. *J Neurophysiol* 80:218–229.
- 1236 Warr WB (1975) Olivocochlear and vestibular efferent neurons of the feline brain stem: their location,  
1237 morphology and number determined by retrograde axonal transport and acetylcholinesterase  
1238 histochemistry. *J Comp Neurol* 161:159–181.
- 1239 Warr WB (1992) Organization of Olivocochlear Efferent Systems in Mammals. In: *The Mammalian*  
1240 *Auditory Pathway: Neuroanatomy* (Webster DB, Popper AN, Fay RR, eds), pp 410–448 Springer  
1241 *Handbook of Auditory Research*. New York, NY: Springer.
- 1242 Warr WB (1995) Parallel Ascending Pathways from the Cochlear Nucleus. In: *Contributions to Sensory*  
1243 *Physiology*, pp 1–38. Elsevier.
- 1244 Warr WB, Guinan JJ (1979) Efferent innervation of the organ of corti: two separate systems. *Brain Res*  
1245 173:152–155.
- 1246 Wiederhold ML, Kiang NYS (1970) Effects of Electric Stimulation of the Crossed Olivocochlear Bundle on  
1247 Single Auditory-Nerve Fibers in the Cat. *J Acoust Soc Am* 48:950–965.
- 1248 Wilson JL, Henson MM, Henson OW (1991) Course and distribution of efferent fibers in the cochlea of  
1249 the mouse. *Hear Res* 55:98–108.
- 1250 Winslow RL, Sachs MB (1987a) Effect of electrical stimulation of the crossed olivocochlear bundle on  
1251 auditory nerve response to tones in noise. *J Neurophysiol* 57:1002–1021.
- 1252 Winslow RL, Sachs MB (1987b) Effect of electrical stimulation of the crossed olivocochlear bundle on  
1253 auditory nerve response to tones in noise. *J Neurophysiol* 57:1002–1021.
- 1254 Wittekindt A, Kaiser J, Abel C (2014) Attentional modulation of the inner ear: A combined otoacoustic  
1255 emission and EEG study. *J Neurosci* 34:9995–10002.
- 1256 Woods CI, Azeredo WJ (1999) Noradrenergic and serotonergic projections to the superior olive:  
1257 Potential for modulation of olivocochlear neurons. *Brain Res* 836:9–18.
- 1258 Wu SH, Oertel D (1987) Maturation of synapses and electrical properties of cells in the cochlear nuclei.  
1259 *Hear Res* 30:99–110.
- 1260 Zaitsev AV, Kim KK, Fedorova IM, Dorofeeva NA, Magazanik LG, Tikhonov DB (2011) Specific mechanism  
1261 of use-dependent channel block of calcium-permeable AMPA receptors provides activity-  
1262 dependent inhibition of glutamatergic neurotransmission. *J Physiol* 589:1587–1601.
- 1263 Zingg B, Chou X lin, Zhang Z gang, Mesik L, Liang F, Tao HW, Zhang LI (2017) AAV-Mediated Anterograde  
1264 Transsynaptic Tagging: Mapping Corticocollicular Input-Defined Neural Pathways for Defense  
1265 Behaviors. *Neuron*.
- 1266 Zucker RS, Regehr WG (2002) Short-term synaptic plasticity. *Annu Rev Physiol* 64:355–405.
- 1267
